# Supplementary material
Source: publisher site journal article supplement (https://www.dovepress.com/get_supplementary_file.php?f=416772.docx)
Supplement: Supplementary file 1 [file get_supplementary_file.php]

**Table S1**

The detailed information of DEmiRNAs between between the allergic group and non-allergic group.

| **Symbol** | **logFC** | **AveExpr** | **t** | **P.Value** | **adj.P.Val** | **B** |
| --- | --- | --- | --- | --- | --- | --- |
| hsa-miR-27a-5p | -1.828406 | 11.570868 | -6.359336 | 9.29E-06 | 0.0044027 | 3.7666895 |
| hsa-miR-23a-5p | -1.329543 | 6.270435 | -5.821046 | 2.56E-05 | 0.0060666 | 2.8074841 |
| hsa-miR-3120-3p | 1.0043891 | 6.018103 | 5.1279124 | 9.99E-05 | 0.0157823 | 1.5104475 |
| hsa-miR-605-3p | 1.1873759 | 5.2417906 | 4.761233 | 0.0002101 | 0.0183668 | 0.7995041 |
| hsa-miR-486-5p | 1.0969579 | 12.897153 | 4.7206632 | 0.0002283 | 0.0183668 | 0.7199443 |
| hsa-miR-6837-3p | 2.3568748 | 1.5190187 | 4.7119002 | 0.0002325 | 0.0183668 | 0.7027379 |
| hsa-miR-1229-3p | 2.3252022 | 1.78812 | 4.0283914 | 0.0009648 | 0.0522905 | -0.65808 |
| hsa-miR-4422 | -2.543258 | 2.2420943 | -3.919611 | 0.0012135 | 0.0522905 | -0.876901 |
| hsa-mir-6125-p3 | -1.959847 | 2.070496 | -3.743361 | 0.0017611 | 0.0661323 | -1.231754 |
| hsa-miR-3690 | -2.988923 | 4.1766327 | -3.385012 | 0.003759 | 0.0848755 | -1.951205 |
| hsa-miR-4772-5p | -1.085314 | 6.1816732 | -3.30574 | 0.0044441 | 0.0848755 | -2.10936 |
| hsa-miR-371b-5p | -1.876545 | 4.489176 | -3.303207 | 0.0044679 | 0.0848755 | -2.114406 |
| hsa-miR-1284 | -2.099077 | 2.7962062 | -3.095844 | 0.0069127 | 0.1129864 | -2.525045 |
| hsa-miR-219b-5p | -1.856625 | 1.7756189 | -2.84876 | 0.0115741 | 0.1662456 | -3.006307 |
| hsa-miR-3920 | 1.8168597 | 1.536212 | 2.795902 | 0.0129115 | 0.1800013 | -3.10779 |
| hsa-mir-3655-p3 | -1.521879 | 0.7609393 | -2.712689 | 0.0153247 | 0.1804137 | -3.266301 |
| hsa-mir-3945-p3 | -1.719806 | 1.1323421 | -2.686359 | 0.0161749 | 0.1804137 | -3.316116 |
| hsa-miR-30c-2-3p | 1.3873921 | 0.6936961 | 2.6800146 | 0.0163865 | 0.1804137 | -3.328094 |
| hsa-miR-1-3p | 2.2310934 | 9.4826617 | 2.6654341 | 0.0168828 | 0.1804137 | -3.355582 |
| hsa-miR-3157-5p | -1.992686 | 1.7798862 | -2.622685 | 0.0184225 | 0.1898316 | -3.435859 |
| hsa-miR-542-5p | -1.813744 | 2.1451541 | -2.417689 | 0.0278618 | 0.2401178 | -3.813562 |
| hsa-miR-3934-5p | -1.824189 | 2.5750421 | -2.262006 | 0.0379086 | 0.2924425 | -4.091173 |
| hsa-miR-4802-3p | -1.593519 | 2.0620438 | -2.255475 | 0.0383963 | 0.2924425 | -4.102623 |
| hsa-miR-618 | -1.46209 | 5.1675379 | -2.145604 | 0.0475245 | 0.3365406 | -4.29268 |
| hsa-miR-3115 | 1.0913176 | 0.5456588 | 2.1374074 | 0.0482801 | 0.3365406 | -4.306658 |

**Table S2**

The detailed information of DEcircRNAs between between the allergic group and non-allergic group.

| **Symbol** | **baseMean** | **log2FoldChange** | **lfcSE** | **stat** | **pvalue** | **padj** |
| --- | --- | --- | --- | --- | --- | --- |
| hsa_circ_0000033 | 8.2513828 | 1.538248717 | 0.5522247 | 2.7855485 | 0.0053437 | 0.0800152 |
| hsa_circ_0000069 | 5.1747772 | 1.06850263 | 0.4972795 | 2.1486963 | 0.0316585 | NA |
| hsa_circ_0000088 | 8.3517718 | 1.68139965 | 0.6525444 | 2.5766825 | 0.0099754 | 0.0951097 |
| hsa_circ_0000106 | 5.7150155 | -1.230269688 | 0.5809168 | -2.117807 | 0.0341914 | NA |
| hsa_circ_0000126 | 12.824137 | -1.723618534 | 0.7768757 | -2.218654 | 0.0265103 | 0.1464499 |
| hsa_circ_0000251 | 8.7483394 | 2.006752691 | 0.6861344 | 2.9247223 | 0.0034476 | 0.0719651 |
| hsa_circ_0000396 | 9.4509529 | -1.697057149 | 0.7432629 | -2.283253 | 0.0224155 | 0.1342569 |
| hsa_circ_0000478 | 5.7307318 | -1.525278722 | 0.556128 | -2.742676 | 0.0060941 | NA |
| hsa_circ_0000607 | 4.2334752 | 1.081002385 | 0.5229531 | 2.0671114 | 0.0387237 | NA |
| hsa_circ_0000690 | 11.212016 | 1.641665336 | 0.6686958 | 2.4550255 | 0.0140875 | 0.1041008 |
| hsa_circ_0000831 | 7.1869203 | 1.435344718 | 0.6766174 | 2.1213535 | 0.0338921 | 0.17066 |
| hsa_circ_0000852 | 16.36257 | 2.486267767 | 0.8813478 | 2.8209837 | 0.0047877 | 0.0800152 |
| hsa_circ_0000871 | 4.765444 | 1.009824228 | 0.5044291 | 2.001915 | 0.0452939 | NA |
| hsa_circ_0000886 | 5.6916442 | -1.509755157 | 0.5395306 | -2.798275 | 0.0051376 | NA |
| hsa_circ_0000996 | 5.5916886 | -3.321821698 | 1.2179494 | -2.727389 | 0.0063838 | NA |
| hsa_circ_0001020 | 8.5483387 | -1.436083064 | 0.6961731 | -2.062825 | 0.0391293 | 0.1886828 |
| hsa_circ_0001077 | 16.48536 | -2.852849105 | 0.832743 | -3.425846 | 0.0006129 | 0.0697467 |
| hsa_circ_0001200 | 6.7153736 | 1.870403463 | 0.6968052 | 2.6842558 | 0.0072691 | NA |
| hsa_circ_0001278 | 15.967517 | 2.890412986 | 0.80958 | 3.5702623 | 0.0003566 | 0.0676397 |
| hsa_circ_0001345 | 9.2298671 | -1.340843305 | 0.6709817 | -1.998331 | 0.0456808 | 0.2010496 |
| hsa_circ_0001356 | 4.5859333 | 1.242382259 | 0.5481189 | 2.2666292 | 0.0234129 | NA |
| hsa_circ_0001458 | 5.7903418 | -1.357700255 | 0.5629093 | -2.411934 | 0.0158681 | NA |
| hsa_circ_0001513 | 7.0024267 | -2.129644004 | 1.0725495 | -1.98559 | 0.0470788 | 0.2029383 |
| hsa_circ_0001543 | 7.1003472 | -1.580860485 | 0.6166629 | -2.563573 | 0.0103601 | 0.0951097 |
| hsa_circ_0001707 | 8.7559379 | 1.998543452 | 0.7149354 | 2.7954183 | 0.0051833 | 0.0800152 |
| hsa_circ_0001772 | 7.0798439 | 1.301962488 | 0.6471469 | 2.0118499 | 0.0442358 | 0.1978503 |
| hsa_circ_0001813 | 22.269891 | -2.375931316 | 0.9372357 | -2.535041 | 0.0112434 | 0.096357 |
| hsa_circ_0001857 | 16.801161 | -2.423468025 | 0.8135618 | -2.978837 | 0.0028934 | 0.0719651 |
| hsa_circ_0001875 | 6.0416713 | 1.301676483 | 0.517101 | 2.5172575 | 0.0118272 | NA |
| hsa_circ_0001958 | 5.6611971 | -1.484978927 | 0.6046563 | -2.455906 | 0.014053 | NA |
| hsa_circ_0001971 | 10.809714 | 1.913702288 | 0.6610882 | 2.8947759 | 0.0037943 | 0.0719651 |
| hsa_circ_0002051 | 7.4915765 | 1.328048983 | 0.613648 | 2.1641868 | 0.03045 | 0.1634534 |
| hsa_circ_0002080 | 6.2551359 | 1.191202922 | 0.5950806 | 2.0017505 | 0.0453116 | NA |
| hsa_circ_0002092 | 7.0845828 | -1.55629106 | 0.5730802 | -2.71566 | 0.0066144 | 0.0836352 |
| hsa_circ_0002377 | 5.7184607 | 1.177013435 | 0.5411761 | 2.1749174 | 0.0296363 | NA |
| hsa_circ_0002416 | 4.2694512 | -1.026594489 | 0.4983104 | -2.060151 | 0.0393841 | NA |
| hsa_circ_0002448 | 7.1624549 | 1.709221327 | 0.6862437 | 2.4906914 | 0.0127495 | 0.0980332 |
| hsa_circ_0002457 | 11.070332 | -1.733001982 | 0.6911392 | -2.507457 | 0.0121603 | 0.096357 |
| hsa_circ_0002924 | 4.1924218 | -2.07728852 | 0.7161157 | -2.900772 | 0.0037224 | NA |
| hsa_circ_0002932 | 6.1067708 | 1.24343461 | 0.6247871 | 1.9901732 | 0.0465719 | NA |
| hsa_circ_0003061 | 7.0109649 | -1.569745393 | 0.624449 | -2.513809 | 0.0119435 | 0.096357 |
| hsa_circ_0003275 | 5.9305942 | -1.211909139 | 0.5353168 | -2.26391 | 0.0235797 | NA |
| hsa_circ_0003347 | 6.0436402 | -1.342506505 | 0.5691339 | -2.358859 | 0.0183312 | NA |
| hsa_circ_0003396 | 6.5329906 | 1.298270742 | 0.5710888 | 2.2733256 | 0.0230066 | NA |
| hsa_circ_0003414 | 5.7908523 | -1.158257712 | 0.5695869 | -2.033505 | 0.0420015 | NA |
| hsa_circ_0003677 | 8.0389024 | -1.593476826 | 0.6357979 | -2.506263 | 0.0122015 | 0.096357 |
| hsa_circ_0003795 | 5.9781683 | 1.855885755 | 0.5941333 | 3.1236858 | 0.001786 | NA |
| hsa_circ_0003830 | 5.4932358 | -1.44089633 | 0.5684982 | -2.534566 | 0.0112587 | NA |
| hsa_circ_0004100 | 7.5465204 | 1.487533426 | 0.6415022 | 2.3188282 | 0.0204044 | 0.1252478 |
| hsa_circ_0004166 | 2.5654993 | -1.75881121 | 0.8573364 | -2.051483 | 0.0402199 | NA |
| hsa_circ_0004257 | 7.1231372 | -1.488722342 | 0.6274675 | -2.372589 | 0.0176639 | 0.1168694 |
| hsa_circ_0004262 | 5.0745518 | 1.120503645 | 0.5479216 | 2.0450073 | 0.0408541 | NA |
| hsa_circ_0004393 | 15.62124 | -2.906012683 | 0.847366 | -3.429466 | 0.0006048 | 0.0697467 |
| hsa_circ_0004511 | 18.533354 | 1.99544974 | 0.7976584 | 2.5016344 | 0.0123622 | 0.096357 |
| hsa_circ_0004556 | 6.6467204 | -1.343956639 | 0.6476837 | -2.07502 | 0.0379847 | NA |
| hsa_circ_0004593 | 6.1480934 | -1.562912767 | 0.6062494 | -2.578003 | 0.0099373 | NA |
| hsa_circ_0004611 | 8.4286724 | -1.687034214 | 0.7036821 | -2.397438 | 0.0165102 | 0.1118368 |
| hsa_circ_0004669 | 6.144764 | 1.074054544 | 0.5279757 | 2.0342877 | 0.0419226 | NA |
| hsa_circ_0004736 | 5.7561224 | 1.115709816 | 0.5562577 | 2.0057428 | 0.0448837 | NA |
| hsa_circ_0004908 | 7.9041174 | -1.296686315 | 0.6420177 | -2.019705 | 0.043414 | 0.1976205 |
| hsa_circ_0005059 | 8.0324869 | 1.335569056 | 0.6718714 | 1.9878343 | 0.04683 | 0.2029383 |
| hsa_circ_0005101 | 9.0574478 | -1.419587395 | 0.6280558 | -2.260289 | 0.0238033 | 0.1397423 |
| hsa_circ_0005113 | 14.307331 | 2.716910758 | 0.8416867 | 3.2279359 | 0.0012469 | 0.0719651 |
| hsa_circ_0005134 | 8.5925326 | 1.206569991 | 0.6101482 | 1.9775032 | 0.0479848 | 0.2037562 |
| hsa_circ_0005238 | 10.248289 | 2.439773237 | 0.7353488 | 3.3178451 | 0.0009071 | 0.0719651 |
| hsa_circ_0005310 | 8.1515743 | 2.328133693 | 0.740446 | 3.1442314 | 0.0016652 | 0.0719651 |
| hsa_circ_0005501 | 5.8040504 | -1.178248537 | 0.5256512 | -2.241503 | 0.0249935 | NA |
| hsa_circ_0005523 | 5.4110078 | 1.353525176 | 0.5547943 | 2.4396882 | 0.0146999 | NA |
| hsa_circ_0005595 | 4.75389 | 1.099053429 | 0.4873371 | 2.2552222 | 0.0241194 | NA |
| hsa_circ_0005646 | 4.6572912 | 1.275603674 | 0.5658691 | 2.2542381 | 0.0241812 | NA |
| hsa_circ_0005759 | 8.8801639 | -1.171750537 | 0.5831698 | -2.009278 | 0.0445076 | 0.1978503 |
| hsa_circ_0005904 | 5.0109973 | 1.222549198 | 0.5544783 | 2.2048639 | 0.0274636 | NA |
| hsa_circ_0005922 | 5.1469014 | -1.304162983 | 0.5324286 | -2.449461 | 0.014307 | NA |
| hsa_circ_0005987 | 5.0612727 | 1.231640556 | 0.5655336 | 2.177838 | 0.0294181 | NA |
| hsa_circ_0005992 | 10.842529 | -1.385457306 | 0.6747804 | -2.053197 | 0.0400534 | 0.191516 |
| hsa_circ_0006075 | 9.2940215 | 2.02589397 | 0.7776454 | 2.6051641 | 0.009183 | 0.0951097 |
| hsa_circ_0006080 | 7.8695049 | -1.785432235 | 0.6559315 | -2.72198 | 0.0064892 | 0.0836352 |
| hsa_circ_0006142 | 6.0767019 | -1.926803547 | 0.6144498 | -3.13582 | 0.0017137 | NA |
| hsa_circ_0006223 | 6.8302647 | -1.343651674 | 0.5996938 | -2.240563 | 0.0250544 | 0.1425595 |
| hsa_circ_0006266 | 12.989931 | 2.23531347 | 0.7602908 | 2.9400768 | 0.0032813 | 0.0719651 |
| hsa_circ_0006558 | 7.3287997 | 1.748787749 | 0.5639355 | 3.1010424 | 0.0019284 | 0.0719651 |
| hsa_circ_0006595 | 5.7560884 | 1.398094545 | 0.5408052 | 2.585209 | 0.009732 | NA |
| hsa_circ_0006657 | 9.1915317 | -1.652963496 | 0.743979 | -2.221788 | 0.0262977 | 0.1464499 |
| hsa_circ_0006736 | 4.8403468 | 1.029680624 | 0.5249469 | 1.9614948 | 0.0498213 | NA |
| hsa_circ_0006845 | 5.1023923 | 1.350304854 | 0.5803562 | 2.3266828 | 0.0199822 | NA |
| hsa_circ_0006858 | 8.8296141 | 1.518346619 | 0.6161732 | 2.4641554 | 0.0137337 | 0.1028217 |
| hsa_circ_0006887 | 10.002272 | -1.425001682 | 0.681119 | -2.092148 | 0.0364253 | 0.1783551 |
| hsa_circ_0006908 | 5.7908383 | -1.097129917 | 0.5178752 | -2.118522 | 0.0341309 | NA |
| hsa_circ_0006938 | 12.228067 | -2.06936512 | 0.8002141 | -2.586014 | 0.0097093 | 0.0951097 |
| hsa_circ_0006942 | 5.4951422 | -1.337515905 | 0.5604509 | -2.3865 | 0.0170096 | NA |
| hsa_circ_0006984 | 6.2608404 | -1.328346654 | 0.5805752 | -2.287984 | 0.0221385 | NA |
| hsa_circ_0006997 | 5.2377418 | -1.225452612 | 0.5156629 | -2.376461 | 0.0174796 | NA |
| hsa_circ_0007149 | 9.8716548 | 2.168005547 | 0.6742473 | 3.2154459 | 0.0013024 | 0.0719651 |
| hsa_circ_0007158 | 6.2824945 | -1.510399597 | 0.6411835 | -2.355643 | 0.0184907 | NA |
| hsa_circ_0007161 | 6.4555618 | -1.135365584 | 0.5658565 | -2.006455 | 0.0448077 | NA |
| hsa_circ_0007196 | 12.691227 | -2.487942774 | 0.8138277 | -3.057088 | 0.002235 | 0.0719651 |
| hsa_circ_0007234 | 6.451229 | 1.358838714 | 0.5418494 | 2.5077794 | 0.0121492 | NA |
| hsa_circ_0007263 | 10.597758 | -1.921527995 | 0.7298443 | -2.632792 | 0.0084686 | 0.0909179 |
| hsa_circ_0007270 | 5.6374342 | -1.478007722 | 0.5845046 | -2.52865 | 0.0114502 | NA |
| hsa_circ_0007477 | 5.894224 | -1.467167655 | 0.5634379 | -2.603956 | 0.0092154 | NA |
| hsa_circ_0007527 | 5.4081343 | -1.832060757 | 0.6077404 | -3.014545 | 0.0025737 | NA |
| hsa_circ_0007539 | 11.28203 | -2.013951106 | 0.7489873 | -2.688899 | 0.0071688 | 0.0851967 |
| hsa_circ_0007631 | 16.918389 | 1.811708555 | 0.853622 | 2.1223779 | 0.033806 | 0.17066 |
| hsa_circ_0007678 | 8.5528042 | -1.7818096 | 0.6696109 | -2.660963 | 0.0077918 | 0.0902894 |
| hsa_circ_0007813 | 6.8941547 | -1.443945161 | 0.6273618 | -2.301615 | 0.0213569 | 0.1292775 |
| hsa_circ_0007894 | 4.933936 | 1.156926192 | 0.5723427 | 2.0213873 | 0.0432397 | NA |
| hsa_circ_0007917 | 5.5808004 | 1.148275115 | 0.5239669 | 2.1915031 | 0.0284154 | NA |
| hsa_circ_0007930 | 14.527813 | 2.600366394 | 0.8250051 | 3.1519396 | 0.0016219 | 0.0719651 |
| hsa_circ_0008002 | 14.772855 | -1.785107658 | 0.794025 | -2.248176 | 0.024565 | 0.1411866 |
| hsa_circ_0008083 | 5.5492886 | -1.156003614 | 0.5194713 | -2.225347 | 0.026058 | NA |
| hsa_circ_0008339 | 10.553809 | -1.539999265 | 0.7580249 | -2.031594 | 0.0421947 | 0.1936244 |
| hsa_circ_0008433 | 8.708165 | -1.551956052 | 0.6867124 | -2.25998 | 0.0238225 | 0.1397423 |
| hsa_circ_0008674 | 6.7711944 | 1.295435223 | 0.6374673 | 2.0321595 | 0.0421375 | 0.1936244 |
| hsa_circ_0008707 | 13.48701 | 2.295211029 | 0.8873701 | 2.5865319 | 0.0096947 | 0.0951097 |
| hsa_circ_0008955 | 8.2467964 | 1.667327846 | 0.7147724 | 2.3326697 | 0.0196655 | 0.1243296 |
| hsa_circ_0009172 | 4.7912481 | -1.150457015 | 0.5116685 | -2.248442 | 0.024548 | NA |
| hsa_circ_0010110 | 5.9942505 | -1.243714545 | 0.5219706 | -2.382729 | 0.0171848 | NA |
| hsa_circ_0011180 | 16.066885 | 2.418933295 | 0.8680012 | 2.7867855 | 0.0053234 | 0.0800152 |
| hsa_circ_0011950 | 9.64694 | -1.992776897 | 0.6800325 | -2.930414 | 0.0033851 | 0.0719651 |
| hsa_circ_0012277 | 6.0629852 | -1.351584277 | 0.5212348 | -2.593043 | 0.0095131 | NA |
| hsa_circ_0012860 | 4.6302224 | -1.185290788 | 0.5109022 | -2.319995 | 0.0203411 | NA |
| hsa_circ_0015164 | 6.5159422 | -1.318143036 | 0.5846209 | -2.254697 | 0.0241523 | NA |
| hsa_circ_0015233 | 5.8166754 | 1.514182313 | 0.6009535 | 2.5196332 | 0.0117477 | NA |
| hsa_circ_0015359 | 5.1129485 | 1.0637835 | 0.5304979 | 2.0052549 | 0.0449358 | NA |
| hsa_circ_0015779 | 10.132706 | 2.25750358 | 0.7422153 | 3.0415751 | 0.0023534 | 0.0719651 |
| hsa_circ_0016890 | 15.431548 | 1.57671203 | 0.7282413 | 2.1650955 | 0.0303804 | 0.1634534 |
| hsa_circ_0017636 | 8.7659544 | -1.542339203 | 0.6917641 | -2.229574 | 0.0257757 | 0.1452119 |
| hsa_circ_0017829 | 8.7394753 | -1.901744168 | 0.6879196 | -2.764486 | 0.0057013 | 0.0811003 |
| hsa_circ_0017831 | 6.01537 | 1.481180168 | 0.5397291 | 2.7443029 | 0.006064 | NA |
| hsa_circ_0017942 | 5.5714985 | -2.912200256 | 1.1003356 | -2.646647 | 0.0081294 | NA |
| hsa_circ_0018973 | 5.6778131 | 1.765470608 | 0.6074824 | 2.9062086 | 0.0036584 | NA |
| hsa_circ_0019061 | 11.424233 | -1.532404282 | 0.7542906 | -2.031584 | 0.0421958 | 0.1936244 |
| hsa_circ_0020175 | 9.681943 | 1.83008274 | 0.6542053 | 2.7974134 | 0.0051514 | 0.0800152 |
| hsa_circ_0021350 | 6.7257364 | 1.604158468 | 0.6245381 | 2.5685519 | 0.0102124 | NA |
| hsa_circ_0021631 | 5.9854735 | 1.468180322 | 0.6092749 | 2.4097172 | 0.0159649 | NA |
| hsa_circ_0022080 | 5.0388027 | 1.311673679 | 0.561266 | 2.3369913 | 0.0194396 | NA |
| hsa_circ_0024542 | 8.447656 | 1.437077676 | 0.682971 | 2.1041563 | 0.0353648 | 0.1764365 |
| hsa_circ_0025947 | 4.7644635 | 1.197218888 | 0.5332589 | 2.2450988 | 0.0247618 | NA |
| hsa_circ_0025971 | 10.006199 | 2.022409393 | 0.7985808 | 2.5325043 | 0.0113251 | 0.096357 |
| hsa_circ_0026280 | 5.8064679 | -1.244546072 | 0.5933051 | -2.09765 | 0.0359361 | NA |
| hsa_circ_0026915 | 5.9468634 | -1.31690019 | 0.5729725 | -2.298365 | 0.021541 | NA |
| hsa_circ_0027236 | 12.340071 | -1.69342411 | 0.7306801 | -2.3176 | 0.0204711 | 0.1252478 |
| hsa_circ_0027496 | 12.533507 | 2.490302375 | 0.8390402 | 2.9680371 | 0.0029971 | 0.0719651 |
| hsa_circ_0027545 | 11.965022 | -2.319904927 | 0.747356 | -3.10415 | 0.0019083 | 0.0719651 |
| hsa_circ_0027702 | 6.8510938 | 1.3250943 | 0.5879124 | 2.2538976 | 0.0242026 | 0.1405233 |
| hsa_circ_0027707 | 12.408292 | -1.666859808 | 0.7113692 | -2.343171 | 0.0191206 | 0.122243 |
| hsa_circ_0028190 | 6.3036099 | -1.331337393 | 0.5610263 | -2.373039 | 0.0176424 | NA |
| hsa_circ_0028611 | 6.0826211 | -1.117504139 | 0.5371678 | -2.080363 | 0.0374922 | NA |
| hsa_circ_0028672 | 4.3616832 | 1.369537756 | 0.5217193 | 2.6250473 | 0.0086637 | NA |
| hsa_circ_0029100 | 4.452717 | -1.016802831 | 0.5094959 | -1.995704 | 0.0459662 | NA |
| hsa_circ_0029377 | 7.5168686 | -1.611846779 | 0.6533494 | -2.467052 | 0.0136231 | 0.1028217 |
| hsa_circ_0029772 | 12.027353 | 2.154549875 | 0.7980346 | 2.6998203 | 0.0069377 | 0.0851967 |
| hsa_circ_0031569 | 7.749544 | -1.308174867 | 0.6600105 | -1.982052 | 0.0474735 | 0.2031008 |
| hsa_circ_0031645 | 8.0720803 | 1.40602862 | 0.5499457 | 2.5566679 | 0.010568 | 0.0954475 |
| hsa_circ_0031657 | 5.4003104 | 1.080706735 | 0.5418172 | 1.9945964 | 0.0460869 | NA |
| hsa_circ_0031713 | 6.0861897 | -1.194003982 | 0.5399882 | -2.211167 | 0.0270243 | NA |
| hsa_circ_0031831 | 6.8145811 | 1.2154206 | 0.5817152 | 2.0893739 | 0.0366741 | 0.1783551 |
| hsa_circ_0032449 | 6.2420211 | -1.490036862 | 0.5856673 | -2.54417 | 0.0109538 | NA |
| hsa_circ_0032830 | 4.6002757 | -1.179272458 | 0.5036107 | -2.341635 | 0.0191995 | NA |
| hsa_circ_0034970 | 7.2994149 | -1.711842054 | 0.6664436 | -2.568622 | 0.0102104 | 0.0951097 |
| hsa_circ_0035183 | 10.664052 | -1.866993291 | 0.7375237 | -2.531435 | 0.0113597 | 0.096357 |
| hsa_circ_0035215 | 5.7725307 | -1.335272347 | 0.5948453 | -2.244739 | 0.0247849 | NA |
| hsa_circ_0035934 | 6.408195 | 1.268906822 | 0.5339069 | 2.3766445 | 0.0174709 | NA |
| hsa_circ_0035957 | 6.6081707 | 1.301495023 | 0.5659127 | 2.2998159 | 0.0214587 | NA |
| hsa_circ_0036768 | 12.809463 | -1.777653849 | 0.7635724 | -2.328075 | 0.0199081 | 0.1244804 |
| hsa_circ_0037060 | 7.1317018 | -1.600218461 | 0.6168656 | -2.594112 | 0.0094836 | 0.0951097 |
| hsa_circ_0037682 | 6.117254 | -1.64711491 | 0.5474337 | -3.008794 | 0.0026229 | NA |
| hsa_circ_0037744 | 6.4983329 | -1.319616732 | 0.5977182 | -2.207757 | 0.0272612 | NA |
| hsa_circ_0037972 | 5.6054365 | -1.37996562 | 0.5165199 | -2.67166 | 0.0075477 | NA |
| hsa_circ_0038138 | 17.10358 | 3.363745864 | 0.8529506 | 3.9436585 | 8.02E-05 | 0.0393554 |
| hsa_circ_0039158 | 7.4617721 | -1.360766992 | 0.6406041 | -2.124193 | 0.033654 | 0.17066 |
| hsa_circ_0039245 | 4.9004298 | 1.041427923 | 0.497089 | 2.0950531 | 0.0361663 | NA |
| hsa_circ_0039783 | 5.1356721 | 1.051979577 | 0.5132662 | 2.0495787 | 0.0404056 | NA |
| hsa_circ_0039960 | 9.7339578 | -2.241254975 | 0.7152205 | -3.133656 | 0.0017264 | 0.0719651 |
| hsa_circ_0040370 | 6.1317085 | 1.262510399 | 0.5785847 | 2.1820668 | 0.0291046 | NA |
| hsa_circ_0041677 | 9.4778041 | 1.79577607 | 0.7347757 | 2.4439786 | 0.0145263 | 0.104116 |
| hsa_circ_0042435 | 7.5040874 | -1.460137203 | 0.5695961 | -2.563461 | 0.0103634 | 0.0951097 |
| hsa_circ_0043428 | 5.2011131 | -1.128486498 | 0.5259038 | -2.145804 | 0.0318886 | NA |
| hsa_circ_0043498 | 5.1892125 | -1.424255005 | 0.5029571 | -2.831762 | 0.0046292 | NA |
| hsa_circ_0044954 | 9.4555721 | -1.954411773 | 0.7604664 | -2.570017 | 0.0101693 | 0.0951097 |
| hsa_circ_0044965 | 5.5150631 | -1.150722393 | 0.5440721 | -2.115018 | 0.0344284 | NA |
| hsa_circ_0045095 | 6.82425 | -1.338705909 | 0.620397 | -2.157821 | 0.0309417 | 0.1637616 |
| hsa_circ_0045559 | 4.9667602 | 1.194971067 | 0.5805735 | 2.0582599 | 0.0395652 | NA |
| hsa_circ_0046029 | 13.542296 | 1.745573346 | 0.8131179 | 2.1467653 | 0.031812 | 0.1660643 |
| hsa_circ_0047430 | 7.7459926 | 1.323755629 | 0.6570235 | 2.0147768 | 0.043928 | 0.1978503 |
| hsa_circ_0049540 | 10.982034 | -1.936404688 | 0.8182756 | -2.366445 | 0.0179598 | 0.1170276 |
| hsa_circ_0050807 | 10.455512 | 1.463593481 | 0.6887898 | 2.1248768 | 0.0335969 | 0.17066 |
| hsa_circ_0052575 | 5.487588 | -1.335658269 | 0.5806728 | -2.300191 | 0.0214374 | NA |
| hsa_circ_0054090 | 5.6276213 | -1.783975195 | 0.5707522 | -3.125656 | 0.0017741 | NA |
| hsa_circ_0054171 | 5.5131961 | -1.536184306 | 0.548153 | -2.802473 | 0.0050712 | NA |
| hsa_circ_0054515 | 7.0607204 | -1.567671773 | 0.6422368 | -2.440956 | 0.0146484 | 0.104116 |
| hsa_circ_0054597 | 4.4400913 | -1.101198098 | 0.4994084 | -2.205005 | 0.0274537 | NA |
| hsa_circ_0054876 | 5.7662614 | 1.382827276 | 0.5025966 | 2.7513661 | 0.0059347 | NA |
| hsa_circ_0055049 | 6.8326632 | -1.658835658 | 0.6248289 | -2.654864 | 0.007934 | 0.0902894 |
| hsa_circ_0055066 | 10.448501 | -2.010939828 | 0.690969 | -2.910318 | 0.0036106 | 0.0719651 |
| hsa_circ_0055091 | 5.2283836 | -1.149979196 | 0.5031335 | -2.285634 | 0.0222757 | NA |
| hsa_circ_0056560 | 7.4411498 | 1.651752474 | 0.6599894 | 2.5026954 | 0.0123252 | 0.096357 |
| hsa_circ_0057252 | 8.1302793 | 1.572387571 | 0.6573026 | 2.3921822 | 0.0167485 | 0.1121166 |
| hsa_circ_0057551 | 6.8174144 | 1.895279865 | 0.6460554 | 2.9336181 | 0.0033504 | 0.0719651 |
| hsa_circ_0057684 | 5.1723909 | 1.166490795 | 0.4970295 | 2.3469247 | 0.0189291 | NA |
| hsa_circ_0058480 | 8.8072941 | 1.382559094 | 0.7028864 | 1.9669736 | 0.0491863 | 0.2073109 |
| hsa_circ_0058919 | 5.6722172 | -1.306541086 | 0.5906045 | -2.21221 | 0.0269522 | NA |
| hsa_circ_0060203 | 11.969678 | -4.110805895 | 1.0786313 | -3.811132 | 0.0001383 | 0.0393554 |
| hsa_circ_0060221 | 9.3591697 | 1.56685239 | 0.662914 | 2.3635831 | 0.0180992 | 0.1170276 |
| hsa_circ_0060443 | 3.8448615 | -1.176019258 | 0.5982915 | -1.965629 | 0.0493415 | NA |
| hsa_circ_0060484 | 7.4684887 | 1.407630378 | 0.6496743 | 2.1666708 | 0.03026 | 0.1634534 |
| hsa_circ_0060740 | 8.1026882 | 1.290970897 | 0.6324733 | 2.0411469 | 0.0412362 | 0.1936244 |
| hsa_circ_0062426 | 5.9085806 | -1.288043698 | 0.5286494 | -2.43648 | 0.014831 | NA |
| hsa_circ_0063452 | 5.7175628 | 1.115251204 | 0.5174587 | 2.1552468 | 0.0311425 | NA |
| hsa_circ_0064556 | 6.4141809 | 1.263511923 | 0.5702382 | 2.2157615 | 0.0267078 | NA |
| hsa_circ_0064790 | 6.4734401 | 1.359827888 | 0.633329 | 2.1471112 | 0.0317844 | NA |
| hsa_circ_0065160 | 5.4533366 | 1.181099507 | 0.4813742 | 2.4535997 | 0.0141434 | NA |
| hsa_circ_0065275 | 7.9013541 | 1.680995171 | 0.5594341 | 3.0048136 | 0.0026574 | 0.0719651 |
| hsa_circ_0065341 | 5.4264909 | -1.12302232 | 0.5479361 | -2.04955 | 0.0404084 | NA |
| hsa_circ_0066783 | 5.0136103 | -1.355747937 | 0.5490144 | -2.469422 | 0.0135332 | NA |
| hsa_circ_0067205 | 5.3598551 | 1.054893141 | 0.5188469 | 2.0331492 | 0.0420375 | NA |
| hsa_circ_0067278 | 6.8014955 | 1.301118459 | 0.603485 | 2.1560081 | 0.031083 | 0.1637616 |
| hsa_circ_0067532 | 5.8096488 | -1.104589383 | 0.5101702 | -2.165139 | 0.030377 | NA |
| hsa_circ_0067716 | 11.219077 | 2.034251161 | 0.7486099 | 2.7173714 | 0.0065803 | 0.0836352 |
| hsa_circ_0067778 | 6.4114484 | 1.501886205 | 0.5650274 | 2.658077 | 0.0078588 | NA |
| hsa_circ_0067888 | 7.2622734 | 1.840910912 | 0.6722421 | 2.7384641 | 0.0061727 | 0.0836252 |
| hsa_circ_0068252 | 10.710046 | 1.599604057 | 0.8014051 | 1.9959994 | 0.045934 | 0.2010496 |
| hsa_circ_0069446 | 8.971188 | 1.894517454 | 0.6581549 | 2.8785284 | 0.0039954 | 0.0733341 |
| hsa_circ_0069606 | 5.5420336 | -1.465036542 | 0.5698294 | -2.571009 | 0.0101403 | NA |
| hsa_circ_0069920 | 5.1470323 | 1.159883638 | 0.5236918 | 2.2148209 | 0.0267724 | NA |
| hsa_circ_0070798 | 6.5041992 | 1.916112145 | 0.6155846 | 3.1126705 | 0.001854 | NA |
| hsa_circ_0071185 | 4.463171 | 1.18862162 | 0.534861 | 2.2222999 | 0.026263 | NA |
| hsa_circ_0071234 | 6.002098 | -1.246725113 | 0.5762721 | -2.163431 | 0.030508 | NA |
| hsa_circ_0071544 | 8.848016 | -2.070714595 | 0.7474929 | -2.770213 | 0.005602 | 0.0811003 |
| hsa_circ_0072081 | 8.6300064 | -1.738021173 | 0.7132646 | -2.436713 | 0.0148214 | 0.104116 |
| hsa_circ_0072654 | 9.6267659 | 1.809471952 | 0.6449724 | 2.8055029 | 0.0050238 | 0.0800152 |
| hsa_circ_0072736 | 7.922563 | 1.907396696 | 0.6373252 | 2.9928156 | 0.0027642 | 0.0719651 |
| hsa_circ_0073752 | 8.9191669 | -1.922048942 | 0.7010412 | -2.741706 | 0.0061121 | 0.0836252 |
| hsa_circ_0074719 | 8.9343943 | -1.871858225 | 0.7084735 | -2.642101 | 0.0082394 | 0.0909179 |
| hsa_circ_0074775 | 19.50073 | 2.583020975 | 0.8755464 | 2.9501817 | 0.0031759 | 0.0719651 |
| hsa_circ_0075102 | 7.3180526 | 1.238502651 | 0.5895414 | 2.10079 | 0.0356594 | 0.1764365 |
| hsa_circ_0075288 | 12.38544 | 2.163638307 | 0.8049101 | 2.6880497 | 0.0071871 | 0.0851967 |
| hsa_circ_0075568 | 9.5909024 | 1.389580085 | 0.6789302 | 2.04672 | 0.0406856 | 0.1929175 |
| hsa_circ_0075715 | 12.34916 | 2.46893554 | 0.8360066 | 2.9532488 | 0.0031445 | 0.0719651 |
| hsa_circ_0076558 | 5.0101992 | -1.248523423 | 0.5515091 | -2.263831 | 0.0235845 | NA |
| hsa_circ_0077176 | 5.3210113 | 1.123594451 | 0.523828 | 2.1449684 | 0.0319554 | NA |
| hsa_circ_0077293 | 7.922319 | -2.206121328 | 0.7137605 | -3.090843 | 0.0019959 | 0.0719651 |
| hsa_circ_0077396 | 6.6141227 | 1.422503876 | 0.5996935 | 2.3720514 | 0.0176896 | NA |
| hsa_circ_0078018 | 14.272672 | 1.916347586 | 0.7519032 | 2.5486627 | 0.0108137 | 0.0961404 |
| hsa_circ_0078486 | 7.028448 | 1.684618152 | 0.5955727 | 2.8285687 | 0.0046757 | 0.0800152 |
| hsa_circ_0079337 | 5.2680805 | -1.265192489 | 0.5473215 | -2.311607 | 0.0207993 | NA |
| hsa_circ_0079762 | 4.3902708 | -1.30653148 | 0.5168505 | -2.527871 | 0.0114757 | NA |
| hsa_circ_0079819 | 8.5227084 | 1.668522401 | 0.6933643 | 2.4064154 | 0.0161099 | 0.1117872 |
| hsa_circ_0082139 | 4.8407104 | -1.173355076 | 0.4917537 | -2.386063 | 0.0170299 | NA |
| hsa_circ_0083834 | 11.212097 | -2.206040327 | 0.7270352 | -3.034296 | 0.002411 | 0.0719651 |
| hsa_circ_0084051 | 8.4905613 | -1.688873986 | 0.6894176 | -2.449711 | 0.0142971 | 0.104116 |
| hsa_circ_0084582 | 8.0034148 | -1.651180259 | 0.6561092 | -2.516624 | 0.0118485 | 0.096357 |
| hsa_circ_0084812 | 8.619155 | -1.588797452 | 0.6620183 | -2.39993 | 0.0163982 | 0.1118368 |
| hsa_circ_0086732 | 4.7463889 | -2.303490901 | 0.8590209 | -2.681531 | 0.0073286 | NA |
| hsa_circ_0088025 | 10.822193 | 2.101148116 | 0.7976812 | 2.6340701 | 0.0084368 | 0.0909179 |
| hsa_circ_0088058 | 10.831572 | -2.21250461 | 0.7625352 | -2.901511 | 0.0037137 | 0.0719651 |
| hsa_circ_0088744 | 5.8846487 | -1.469544465 | 0.5762054 | -2.550383 | 0.0107605 | NA |
| hsa_circ_0091515 | 5.8710679 | -1.291694357 | 0.5330008 | -2.423438 | 0.0153744 | NA |

**Table S3**

The detailed information of DElncRNAs between between the allergic group and non-allergic group.

| **Symbol** | **baseMean** | **log2FoldChange** | **lfcSE** | **stat** | **pvalue** | **padj** |
| --- | --- | --- | --- | --- | --- | --- |
| AL645608.7 | 21.456861 | -1.740966 | 0.4330324 | -4.020405 | 5.81E-05 | 0.0059762 |
| TTLL10-AS1 | 2.5219091 | -2.102633 | 0.69139 | -3.041168 | 0.0023566 | 0.0471031 |
| AL645728.1 | 12.48514 | -1.134767 | 0.3633747 | -3.122856 | 0.0017911 | 0.0407013 |
| CAMTA1-DT | 5.6134835 | -1.374288 | 0.4724083 | -2.90911 | 0.0036246 | 0.0602559 |
| AL031283.1 | 97.949743 | -1.51238 | 0.3419038 | -4.423407 | 9.72E-06 | 0.0020927 |
| AL121992.3 | 2.5498921 | 1.259592 | 0.6147776 | 2.0488581 | 0.040476 | 0.2367392 |
| EMC1-AS1 | 9.8214551 | -1.154195 | 0.3410194 | -3.384545 | 0.000713 | 0.0255907 |
| AL031727.2 | 2.7363796 | -2.254885 | 0.8159866 | -2.763384 | 0.0057205 | 0.0780703 |
| LINC01635 | 4.8642532 | -1.008012 | 0.4609573 | -2.186779 | 0.0287587 | 0.1946376 |
| LINC01355 | 23.6521 | 1.8845995 | 0.4298739 | 4.3840748 | 1.16E-05 | 0.0022249 |
| LINC02574 | 15.808081 | -1.521892 | 0.3934702 | -3.867871 | 0.0001098 | 0.0086333 |
| AL031289.1 | 1.4112426 | 1.7838623 | 0.8953487 | 1.992366 | 0.0463309 | NA |
| AL512353.1 | 6.0657723 | 1.1887819 | 0.4484029 | 2.6511465 | 0.0080219 | 0.0922054 |
| HSD52 | 1.4266687 | -1.914216 | 0.9075537 | -2.109204 | 0.034927 | NA |
| AL031429.2 | 2.232831 | 2.0215161 | 0.9815668 | 2.0594789 | 0.0394484 | 0.2322816 |
| AC104836.1 | 1.3216029 | 2.1218911 | 0.9742407 | 2.1779947 | 0.0294064 | NA |
| HIPK1-AS1 | 150.31669 | -1.687761 | 0.4433825 | -3.806559 | 0.0001409 | 0.0099727 |
| LINC01762 | 11.221125 | 1.0593572 | 0.3509104 | 3.0188822 | 0.0025371 | 0.0492892 |
| AL358072.1 | 5.4170463 | 1.2360075 | 0.455341 | 2.7144658 | 0.0066383 | 0.084414 |
| AL391069.2 | 1.8484141 | -1.777354 | 0.7547262 | -2.354965 | 0.0185244 | NA |
| AL589765.1 | 1.1668676 | 2.3188494 | 0.9905645 | 2.3409373 | 0.0192354 | NA |
| AL589765.7 | 4.0238536 | -1.105437 | 0.5600103 | -1.973958 | 0.0483866 | 0.2605511 |
| AL451085.1 | 16.271468 | -1.739598 | 0.3866001 | -4.499735 | 6.80E-06 | 0.0016853 |
| AL365181.3 | 3.7761702 | 2.3363846 | 0.6947469 | 3.3629291 | 0.0007712 | 0.0269052 |
| AL359541.1 | 1.7495973 | -1.971324 | 0.9617191 | -2.049792 | 0.0403847 | NA |
| AL596325.1 | 5.8558846 | -1.55895 | 0.5983265 | -2.605518 | 0.0091735 | 0.0996617 |
| RGS5-AS1 | 5.7098845 | 1.2751512 | 0.4064163 | 3.1375497 | 0.0017037 | 0.0398111 |
| AL451074.5 | 2.120255 | 1.6718872 | 0.7501169 | 2.2288355 | 0.0258249 | 0.184081 |
| AL358115.1 | 5.2892918 | 1.5192531 | 0.4479086 | 3.3918818 | 0.0006941 | 0.0255907 |
| Z99572.1 | 6.1995879 | -1.180421 | 0.4454039 | -2.650227 | 0.0080438 | 0.0922398 |
| DNM3-IT1 | 2.0426238 | 1.6423691 | 0.7401838 | 2.2188665 | 0.0264958 | 0.1871973 |
| LINC02776 | 3.6918129 | -2.394887 | 0.7836172 | -3.056195 | 0.0022417 | 0.0468903 |
| LINC02770 | 6.6255628 | 1.4634101 | 0.5516508 | 2.6527834 | 0.0079831 | 0.0922054 |
| AL357793.1 | 17.624674 | 1.2144388 | 0.3957275 | 3.0688761 | 0.0021487 | 0.0460799 |
| LINC00862 | 5.9604422 | 1.1801986 | 0.470802 | 2.506783 | 0.0121835 | 0.1197565 |
| LINC02608 | 5.5744181 | -1.563665 | 0.5308439 | -2.945621 | 0.0032231 | 0.0554413 |
| AC092803.1 | 35.147678 | -1.234624 | 0.3427566 | -3.602041 | 0.0003157 | 0.0163547 |
| LINC02257 | 5.2138421 | -1.256779 | 0.5153786 | -2.438556 | 0.0147461 | 0.1355327 |
| LINC02474 | 0.876669 | -2.372159 | 1.0193785 | -2.327064 | 0.0199619 | NA |
| LINC01132 | 7.0685337 | -1.271883 | 0.5080626 | -2.503398 | 0.0123007 | 0.1204683 |
| AL139161.1 | 8.5743951 | -1.508828 | 0.5809358 | -2.597237 | 0.0093977 | 0.1012092 |
| AL606534.1 | 5.4385933 | 1.241139 | 0.4569378 | 2.71621 | 0.0066034 | 0.084414 |
| BX323046.1 | 15.334175 | -1.400726 | 0.3155819 | -4.43855 | 9.06E-06 | 0.0020893 |
| AL356512.1 | 39.562181 | -1.026457 | 0.296614 | -3.460582 | 0.000539 | 0.0218643 |
| TMEM18-DT | 3.7498931 | -1.682317 | 0.6077267 | -2.768213 | 0.0056365 | 0.077692 |
| EIPR1-IT1 | 16.279465 | 1.032629 | 0.305077 | 3.3848146 | 0.0007123 | 0.0255907 |
| LINC01871 | 94.84933 | 1.2187686 | 0.2171543 | 5.6124534 | 1.99E-08 | 3.29E-05 |
| AC013400.1 | 8.6992792 | -1.067223 | 0.3567098 | -2.991853 | 0.0027729 | 0.0520159 |
| AC009228.1 | 8.9712032 | 1.0206319 | 0.3949537 | 2.5841812 | 0.0097611 | 0.1040704 |
| DNAJC27-AS1 | 41.695622 | -1.042332 | 0.3149659 | -3.30935 | 0.0009351 | 0.0293204 |
| MAPRE3-AS1 | 27.876405 | -1.096976 | 0.2564071 | -4.27826 | 1.88E-05 | 0.0032177 |
| LINC02583 | 2.65112 | -1.765981 | 0.6933538 | -2.547013 | 0.0108649 | 0.1119021 |
| LGALSL-DT | 2.8167773 | 3.3723418 | 1.0117259 | 3.3332562 | 0.0008584 | 0.0283487 |
| AC103563.2 | 32.980312 | 1.2254643 | 0.3031969 | 4.0418107 | 5.30E-05 | 0.0055906 |
| AC012307.1 | 16.021966 | -1.369142 | 0.3348116 | -4.08929 | 4.33E-05 | 0.0051788 |
| TBC1D8-AS1 | 5.9554941 | -1.279816 | 0.4341113 | -2.948129 | 0.003197 | 0.0554413 |
| AC009480.1 | 10.139932 | 1.1820707 | 0.4316456 | 2.7385218 | 0.0061716 | 0.0819682 |
| AC007277.1 | 3.4721601 | 1.3227769 | 0.5891708 | 2.2451502 | 0.0247585 | 0.1791429 |
| AC079305.1 | 13.842212 | -1.028473 | 0.3147595 | -3.267489 | 0.0010851 | 0.03162 |
| AC067945.1 | 1.1266793 | 2.7320026 | 1.0324547 | 2.6461234 | 0.008142 | NA |
| AC010983.1 | 4.6366574 | 1.0512531 | 0.5055403 | 2.0794647 | 0.0375747 | 0.2237318 |
| LINC01792 | 6.4684949 | -2.411937 | 0.4844493 | -4.97872 | 6.40E-07 | 0.0003171 |
| AC080075.1 | 2.3687003 | 1.5360521 | 0.7120355 | 2.1572688 | 0.0309847 | 0.2025044 |
| AC009226.1 | 65.198545 | -1.056151 | 0.2212057 | -4.77452 | 1.80E-06 | 0.0005249 |
| LINC00607 | 4.8223459 | -2.023798 | 0.5689866 | -3.556846 | 0.0003753 | 0.0178828 |
| CATIP-AS2 | 12.664439 | -1.272515 | 0.3585367 | -3.549189 | 0.0003864 | 0.0180479 |
| LINC01907 | 2.0134288 | 1.5950101 | 0.7479354 | 2.1325506 | 0.0329616 | 0.2095127 |
| AC017104.1 | 141.88815 | -1.288035 | 0.5148249 | -2.50189 | 0.0123532 | 0.1204683 |
| LINC00471 | 4.7186667 | -1.280915 | 0.5064229 | -2.529338 | 0.0114278 | 0.1150675 |
| AC064874.1 | 9.4653733 | 1.0488208 | 0.4202597 | 2.495649 | 0.0125727 | 0.1218887 |
| AC104667.1 | 3.6440478 | -1.369977 | 0.605586 | -2.262233 | 0.023683 | 0.1758136 |
| CNTN4-AS1 | 2.5878726 | 2.0803454 | 0.9085357 | 2.2897785 | 0.0220342 | 0.1694988 |
| UBE2E1-AS1 | 4.8087278 | -1.244139 | 0.463636 | -2.683439 | 0.0072869 | 0.0880474 |
| AC105935.1 | 4.5177036 | -1.025209 | 0.4640447 | -2.20929 | 0.0271545 | 0.1891662 |
| AC072039.2 | 1.3139144 | 2.5524321 | 1.0048794 | 2.5400381 | 0.011084 | NA |
| AC080013.1 | 18.49629 | 1.1769796 | 0.3083164 | 3.8174403 | 0.0001348 | 0.0098091 |
| AC080013.2 | 2.8067967 | 1.6497988 | 0.6080633 | 2.7132025 | 0.0066636 | 0.084414 |
| AC092919.1 | 8.951482 | 1.2074302 | 0.4090185 | 2.9520188 | 0.003157 | 0.0554413 |
| ETV5-AS1 | 1.9379918 | -2.43254 | 0.9303845 | -2.614554 | 0.0089344 | NA |
| AC097381.2 | 0.8998241 | 2.368684 | 1.0253118 | 2.3102085 | 0.0208766 | NA |
| LINC00504 | 12.142325 | -1.05574 | 0.3789325 | -2.78609 | 0.0053348 | 0.0766048 |
| AC124016.1 | 10.070417 | -1.069451 | 0.3259257 | -3.281271 | 0.0010334 | 0.0312273 |
| AF213884.3 | 25.338036 | -1.187277 | 0.3262567 | -3.639089 | 0.0002736 | 0.0155797 |
| AC096577.1 | 17.328243 | 1.1545468 | 0.3328329 | 3.4688484 | 0.0005227 | 0.0215786 |
| IL21-AS1 | 2.9470476 | 1.5471132 | 0.6478881 | 2.3879328 | 0.0169434 | 0.1451911 |
| AC112236.2 | 8.9662945 | -1.114828 | 0.4837483 | -2.304563 | 0.0211911 | 0.1677808 |
| AC097467.3 | 22.91824 | -1.157642 | 0.254839 | -4.54264 | 5.56E-06 | 0.0014485 |
| WWC2-AS2 | 1.34519 | -2.619269 | 1.0383863 | -2.522442 | 0.0116543 | NA |
| AC091849.2 | 1.3848164 | -2.244894 | 1.0386976 | -2.161258 | 0.0306754 | NA |
| LINC02102 | 5.8555118 | 1.0300816 | 0.4173224 | 2.4683114 | 0.0135752 | 0.1283428 |
| AC010491.1 | 20.065998 | -1.06404 | 0.4011511 | -2.652468 | 0.0079906 | 0.0922054 |
| AC026801.2 | 5.0819195 | -2.011316 | 0.572784 | -3.511475 | 0.0004456 | 0.0195789 |
| AC114947.2 | 49.942623 | -1.218331 | 0.2880483 | -4.229605 | 2.34E-05 | 0.0038658 |
| AC104126.1 | 9.8183942 | 1.100882 | 0.5153166 | 2.1363218 | 0.0326532 | 0.2095127 |
| AC008629.1 | 1.1785892 | 2.8170587 | 0.9978966 | 2.8229966 | 0.0047577 | NA |
| AC010307.3 | 1.8619542 | 2.3258365 | 0.8746792 | 2.6590736 | 0.0078356 | NA |
| AC114939.1 | 5.3688859 | 1.0809249 | 0.4362847 | 2.477568 | 0.0132281 | 0.1262661 |
| AC025434.1 | 5.0137711 | 1.5216875 | 0.5691789 | 2.6734786 | 0.0075069 | 0.0893972 |
| MIR3142HG | 73.055175 | 1.0450776 | 0.3041252 | 3.4363405 | 0.0005896 | 0.0231775 |
| AC022217.2 | 1.5465375 | 2.397139 | 0.9742353 | 2.4605339 | 0.013873 | NA |
| AL512329.2 | 4.1885213 | 1.0391185 | 0.4865668 | 2.135613 | 0.032711 | 0.2095127 |
| AL031123.1 | 3.4107844 | -1.501788 | 0.5349818 | -2.807177 | 0.0049978 | 0.0732584 |
| AL080313.2 | 4.0420976 | 1.2906997 | 0.5323235 | 2.4246529 | 0.015323 | 0.1374906 |
| HCP5 | 9.4072857 | -1.191384 | 0.369868 | -3.221107 | 0.001277 | 0.0338043 |
| AL135905.1 | 4.0136022 | -1.571316 | 0.5274438 | -2.979115 | 0.0028908 | 0.0527787 |
| AL391807.1 | 17.346428 | -1.417732 | 0.4376698 | -3.239274 | 0.0011983 | 0.0329811 |
| AL357315.1 | 1.1876277 | 2.3833867 | 1.0596912 | 2.2491333 | 0.024504 | NA |
| MYB-AS1 | 3.3183436 | 1.2234656 | 0.577794 | 2.1174771 | 0.0342194 | 0.2145858 |
| LINC00271 | 12.43022 | -1.066776 | 0.303876 | -3.510564 | 0.0004472 | 0.0195789 |
| AL450344.2 | 10.671518 | 1.4538549 | 0.5272535 | 2.7574119 | 0.0058261 | 0.0788589 |
| C6orf99 | 15.099033 | -1.661505 | 0.784073 | -2.119069 | 0.0340846 | 0.2143002 |
| AL022069.1 | 3.857584 | -1.026668 | 0.5236374 | -1.960647 | 0.0499202 | 0.2656332 |
| AC093627.6 | 2.3988318 | 1.7345818 | 0.8256203 | 2.1009439 | 0.0356459 | 0.2166745 |
| AC093627.3 | 11.511621 | -1.027646 | 0.4661853 | -2.204373 | 0.0274981 | 0.1905256 |
| AC024028.1 | 6.0093096 | 1.4343096 | 0.6120755 | 2.343354 | 0.0191112 | 0.1567501 |
| AC019117.1 | 3.0256535 | 1.3309721 | 0.6300301 | 2.1125534 | 0.034639 | 0.2150598 |
| AC005062.1 | 2.0658268 | 1.6577389 | 0.8192445 | 2.0234972 | 0.0430219 | 0.2469647 |
| GS1-124K5.4 | 10.562806 | -1.076487 | 0.3342017 | -3.22107 | 0.0012771 | 0.0338043 |
| AC074183.1 | 2.2542828 | -1.484496 | 0.743468 | -1.996718 | 0.0458559 | 0.2545239 |
| PCOLCE-AS1 | 7.0033016 | 1.0469675 | 0.3975996 | 2.6332205 | 0.0084579 | 0.0947978 |
| AC018643.1 | 6.1296205 | -1.264285 | 0.4547635 | -2.780093 | 0.0054343 | 0.0771395 |
| AC083880.1 | 4.4807191 | -1.648995 | 0.6050503 | -2.725385 | 0.0064226 | 0.0835113 |
| ARHGEF35-AS1 | 79.424053 | 1.021195 | 0.2878939 | 3.5471228 | 0.0003895 | 0.0180479 |
| REPIN1-AS1 | 7.7372718 | -1.061759 | 0.3663176 | -2.898466 | 0.0037499 | 0.0619072 |
| AC022784.5 | 4.1945329 | -1.12639 | 0.5178468 | -2.175142 | 0.0296195 | 0.1977561 |
| AC123777.1 | 9.1046761 | -1.263475 | 0.5025073 | -2.514341 | 0.0119255 | 0.1181579 |
| AC105046.1 | 46.346251 | 1.5057835 | 0.5057634 | 2.977249 | 0.0029085 | 0.0527787 |
| HMBOX1-IT1 | 4.5105756 | 1.7270114 | 0.5740028 | 3.0087162 | 0.0026235 | 0.050376 |
| AC044849.1 | 68.160008 | -1.026984 | 0.1900449 | -5.403904 | 6.52E-08 | 4.61E-05 |
| AC087623.2 | 36.609107 | -1.298162 | 0.2928178 | -4.433345 | 9.28E-06 | 0.0020893 |
| AC103724.4 | 17.408172 | -1.354343 | 0.3452409 | -3.922894 | 8.75E-05 | 0.0079752 |
| AC090186.1 | 4.1504249 | 1.2572409 | 0.5467211 | 2.2996019 | 0.0214708 | 0.1686566 |
| AC100812.1 | 18.117248 | -1.93832 | 0.4854913 | -3.992493 | 6.54E-05 | 0.0064781 |
| MSC-AS1 | 62.554002 | 1.0331444 | 0.2645084 | 3.9059041 | 9.39E-05 | 0.0080181 |
| RDH10-AS1 | 14.966342 | 1.2953347 | 0.3829404 | 3.3826015 | 0.000718 | 0.0255907 |
| AC011773.4 | 7.3168472 | -1.609375 | 0.5669248 | -2.83878 | 0.0045286 | 0.0696735 |
| AC011773.1 | 8.4830909 | -1.204532 | 0.5389229 | -2.235073 | 0.0254126 | 0.1816649 |
| LINC00534 | 17.948187 | 1.1853343 | 0.3033544 | 3.9074237 | 9.33E-05 | 0.0080181 |
| LINC00535 | 1.7949991 | -2.324017 | 0.8403297 | -2.765601 | 0.0056818 | NA |
| GASAL1 | 43.275002 | -1.205543 | 0.2743694 | -4.393867 | 1.11E-05 | 0.0022249 |
| AC021237.1 | 6.1100492 | 1.1400972 | 0.4175326 | 2.7305586 | 0.0063227 | 0.0830841 |
| SMILR | 13.859548 | 1.4064981 | 0.370853 | 3.7926022 | 0.0001491 | 0.0101999 |
| LINC01151 | 5.2940499 | 2.3203349 | 0.5678882 | 4.0859007 | 4.39E-05 | 0.0051788 |
| AC016405.3 | 12.568036 | -1.552407 | 0.5003123 | -3.102877 | 0.0019165 | 0.0425754 |
| AC016405.2 | 10.181439 | -1.171002 | 0.4150578 | -2.821299 | 0.004783 | 0.0715854 |
| AC009908.1 | 2.8211924 | -2.096711 | 0.6943519 | -3.019667 | 0.0025305 | 0.0492892 |
| LINC00051 | 7.0580202 | -1.547639 | 0.4257804 | -3.63483 | 0.0002782 | 0.0156594 |
| ZNF252P-AS1 | 6.7907774 | 1.3615667 | 0.44559 | 3.0556492 | 0.0022457 | 0.0468903 |
| AL590399.5 | 3.514209 | 2.2324416 | 0.8054616 | 2.77163 | 0.0055776 | 0.0776169 |
| AL451065.1 | 4.2957901 | -1.571611 | 0.5467384 | -2.874521 | 0.0040464 | 0.0650841 |
| AL691447.2 | 24.939359 | 1.2675707 | 0.5945728 | 2.1319016 | 0.0330149 | 0.2095127 |
| AL161729.4 | 3.1949531 | 1.9079596 | 0.7601681 | 2.509918 | 0.0120759 | 0.1189346 |
| LINC00092 | 34.838037 | -1.192059 | 0.3747958 | -3.180555 | 0.0014699 | 0.0365518 |
| AL359710.1 | 2.3847034 | 1.298256 | 0.6461555 | 2.0092007 | 0.0445159 | 0.2494701 |
| CT70 | 8.853854 | -1.132043 | 0.4573669 | -2.475131 | 0.0133187 | 0.1268865 |
| AL354710.2 | 11.973139 | -1.412342 | 0.4215936 | -3.350008 | 0.0008081 | 0.0278007 |
| AL359878.2 | 4.0367213 | -1.448999 | 0.5215007 | -2.778518 | 0.0054607 | 0.077146 |
| AL450322.1 | 4.4466721 | -1.477642 | 0.6924881 | -2.133816 | 0.0328579 | 0.2095127 |
| LINC02639 | 7.0425069 | -1.435384 | 0.5966219 | -2.405852 | 0.0161348 | 0.1417232 |
| RPP38-DT | 25.92982 | -1.622305 | 0.2986483 | -5.43216 | 5.57E-08 | 4.61E-05 |
| AL590068.1 | 5.3416533 | 1.268017 | 0.4960553 | 2.5562007 | 0.0105822 | 0.1099041 |
| ITGB1-DT | 7.0922763 | 1.1110603 | 0.4306157 | 2.5801664 | 0.0098753 | 0.1045344 |
| IATPR | 19.715303 | 1.053433 | 0.3294745 | 3.1973127 | 0.0013871 | 0.0352406 |
| AL022344.1 | 9.0830993 | 1.6287986 | 0.4911027 | 3.3166147 | 0.0009112 | 0.0288011 |
| AC136475.9 | 6.5012563 | -1.511948 | 0.5127141 | -2.94891 | 0.003189 | 0.0554413 |
| AC116456.1 | 2.3579858 | -2.480385 | 0.8578839 | -2.891283 | 0.0038367 | 0.0628093 |
| AC103974.1 | 6.1488292 | -1.846269 | 0.4840508 | -3.814205 | 0.0001366 | 0.0098091 |
| TSPAN18-AS1 | 2.7126185 | 1.4167205 | 0.6441585 | 2.1993352 | 0.0278541 | 0.1916517 |
| AP000640.2 | 2.5368392 | -1.348764 | 0.6705147 | -2.011535 | 0.044269 | 0.2494701 |
| AP003721.4 | 2.2103921 | -2.371242 | 0.7939633 | -2.986589 | 0.0028211 | 0.052148 |
| AP003108.1 | 1.223499 | -2.041361 | 0.9847934 | -2.072883 | 0.0381832 | NA |
| AP001363.1 | 151.20935 | -1.497586 | 0.2766789 | -5.412723 | 6.21E-08 | 4.61E-05 |
| AP001363.2 | 26.125663 | -1.103554 | 0.272591 | -4.048386 | 5.16E-05 | 0.0055541 |
| AP003068.2 | 120.30806 | 1.053311 | 0.4493671 | 2.3439879 | 0.0190788 | 0.1567501 |
| AP003785.1 | 2.3190312 | 1.4769723 | 0.6987749 | 2.1136595 | 0.0345444 | 0.2150598 |
| PDE2A-AS1 | 3.1370956 | -1.453366 | 0.6429953 | -2.260306 | 0.0238023 | 0.1759946 |
| AP001189.3 | 77.312228 | 1.5554841 | 0.3774591 | 4.120934 | 3.77E-05 | 0.0047271 |
| AP001189.1 | 434.65206 | 1.1442156 | 0.3173684 | 3.6053232 | 0.0003118 | 0.0163547 |
| AP003680.1 | 12.439979 | -2.098059 | 0.7386182 | -2.840519 | 0.004504 | 0.0695106 |
| AP000873.3 | 7.4464256 | -1.431304 | 0.5349529 | -2.67557 | 0.0074602 | 0.0893367 |
| AP000654.1 | 12.673124 | 1.200966 | 0.3092288 | 3.8837458 | 0.0001029 | 0.0084928 |
| LINC02700 | 3.4794 | -1.67873 | 0.5637847 | -2.977608 | 0.0029051 | 0.0527787 |
| AP003049.2 | 5.1433683 | 2.0770796 | 0.5230399 | 3.9711686 | 7.15E-05 | 0.0069473 |
| AP003396.3 | 1.5560598 | -2.455769 | 0.9522394 | -2.57894 | 0.0099104 | NA |
| USP2-AS1 | 5.1421393 | -1.548296 | 0.5193451 | -2.981247 | 0.0028708 | 0.0526734 |
| AP000708.1 | 5.0191823 | -1.184054 | 0.5714093 | -2.072164 | 0.0382502 | 0.2263934 |
| LINC02455 | 2.1910144 | -3.42392 | 0.8881583 | -3.855079 | 0.0001157 | 0.0089553 |
| PLBD1-AS1 | 1.8249076 | -2.020411 | 0.8749504 | -2.309172 | 0.020934 | NA |
| AC087318.1 | 1.2689351 | 2.4716104 | 0.9962464 | 2.4809227 | 0.0131043 | NA |
| OVCH1-AS1 | 6.469842 | 1.270829 | 0.5634378 | 2.2554913 | 0.0241025 | 0.1766329 |
| LINC02381 | 5.9867037 | 1.1449952 | 0.4684699 | 2.444117 | 0.0145207 | 0.1342082 |
| AC034102.3 | 1.2300999 | -2.069626 | 0.9791047 | -2.113795 | 0.0345328 | NA |
| AC078777.1 | 10.653857 | 1.0067953 | 0.3966096 | 2.5385048 | 0.0111327 | 0.113396 |
| LINC02399 | 19.922755 | -1.848736 | 0.4560828 | -4.053509 | 5.05E-05 | 0.0055541 |
| LINC02404 | 5.6392527 | -1.453149 | 0.525781 | -2.763791 | 0.0057134 | 0.0780703 |
| AC011595.1 | 6.9317496 | 1.9454785 | 0.6371593 | 3.0533627 | 0.0022629 | 0.0468903 |
| AC068768.1 | 3.4836257 | -1.292436 | 0.5841504 | -2.212506 | 0.0269317 | 0.1884459 |
| LINC00943 | 99.896463 | 1.0690638 | 0.3222414 | 3.3175867 | 0.000908 | 0.0288011 |
| LINC02344 | 6.3526847 | -1.705663 | 0.5113894 | -3.33535 | 0.0008519 | 0.0283487 |
| AL139383.1 | 1.258878 | 2.4636683 | 0.9845191 | 2.5024078 | 0.0123352 | NA |
| SLC25A30-AS1 | 2.8998725 | -1.453762 | 0.6055906 | -2.400568 | 0.0163696 | 0.1422723 |
| OBI1-AS1 | 3.0226946 | 1.3169846 | 0.6432533 | 2.0473809 | 0.0406207 | 0.2370258 |
| STK24-AS1 | 14.358683 | -1.109936 | 0.3696943 | -3.002307 | 0.0026794 | 0.0512503 |
| LINC00283 | 1.6714259 | 2.9453927 | 0.9456998 | 3.1145112 | 0.0018425 | NA |
| AL355075.1 | 7.729035 | -1.054539 | 0.4241268 | -2.486376 | 0.0129052 | 0.124624 |
| AL135744.1 | 1.7176051 | -2.245924 | 0.8992356 | -2.497593 | 0.012504 | NA |
| PRMT5-AS1 | 16.125334 | -1.279342 | 0.4526544 | -2.82631 | 0.0047088 | 0.0709034 |
| AL132780.2 | 4.1956694 | 1.356888 | 0.5092768 | 2.6643429 | 0.0077139 | 0.0903419 |
| LINC00596 | 0.9587711 | 2.0072093 | 0.9797048 | 2.0487899 | 0.0404827 | NA |
| AL133163.2 | 2.3333762 | 1.8651456 | 0.7882399 | 2.3662156 | 0.017971 | 0.1509042 |
| AL162311.1 | 2.4962268 | 2.2530189 | 0.754714 | 2.9852617 | 0.0028334 | 0.0521801 |
| AL139099.2 | 1.3658434 | -2.225096 | 1.0246031 | -2.171667 | 0.0298808 | NA |
| AL157911.1 | 4.0561959 | -1.22724 | 0.568272 | -2.1596 | 0.0308036 | 0.2021208 |
| AC004817.1 | 2.4044894 | 1.9322815 | 0.7164926 | 2.6968619 | 0.0069996 | 0.0866525 |
| AC004817.4 | 9.1147805 | 1.362648 | 0.455351 | 2.9925224 | 0.0027668 | 0.0520159 |
| AC005225.3 | 3.2658451 | -1.814866 | 0.7228692 | -2.510643 | 0.0120511 | 0.1189271 |
| AF111167.1 | 125.95998 | -1.778296 | 0.6049653 | -2.939501 | 0.0032874 | 0.0563525 |
| AL163932.1 | 12.787612 | -1.286364 | 0.4457106 | -2.886096 | 0.0039005 | 0.0632209 |
| AL162151.1 | 7.2405998 | 1.401908 | 0.3898336 | 3.5961706 | 0.0003229 | 0.0163547 |
| LINC00677 | 47.348093 | -1.125034 | 0.3252796 | -3.458667 | 0.0005429 | 0.0218643 |
| LINC02298 | 5.5939617 | 1.0133951 | 0.4208718 | 2.4078475 | 0.0160469 | 0.1416027 |
| LINC02256 | 13.225537 | -1.22968 | 0.34311 | -3.583924 | 0.0003385 | 0.0169372 |
| LINC02345 | 4.1991983 | -1.240724 | 0.5238085 | -2.368659 | 0.0178527 | 0.1504119 |
| LINC02694 | 14.326275 | 1.1728146 | 0.3297398 | 3.5567887 | 0.0003754 | 0.0178828 |
| AC022929.1 | 4.2144657 | 1.3760522 | 0.5564133 | 2.4730756 | 0.0133956 | 0.1271297 |
| AC087878.1 | 6.1417465 | 1.5806228 | 0.4894795 | 3.2291913 | 0.0012414 | 0.0334236 |
| C15orf56 | 3.3015512 | -4.833173 | 0.8909226 | -5.424908 | 5.80E-08 | 4.61E-05 |
| PLA2G4E-AS1 | 3.4730116 | -3.122176 | 0.7420992 | -4.207222 | 2.59E-05 | 0.0041124 |
| AC025580.2 | 91.036559 | -1.044422 | 0.3301519 | -3.163458 | 0.0015591 | 0.0377908 |
| AC012100.2 | 8.7531557 | -1.02521 | 0.4039398 | -2.538027 | 0.0111479 | 0.113396 |
| MAPK6-DT | 8.0991127 | -1.299583 | 0.4148819 | -3.132416 | 0.0017337 | 0.0403237 |
| AC021483.2 | 5.9045763 | 1.3340603 | 0.4964954 | 2.686954 | 0.0072107 | 0.0878125 |
| LINC01585 | 2.0600518 | -1.706059 | 0.7023811 | -2.428964 | 0.015142 | 0.1369768 |
| AC027020.1 | 11.56559 | 1.0267196 | 0.3226638 | 3.1820103 | 0.0014626 | 0.0365518 |
| AC141586.2 | 2.4990363 | -1.322689 | 0.6491461 | -2.037583 | 0.0415916 | 0.2409881 |
| AC099518.4 | 1.0068904 | -2.601548 | 1.013136 | -2.567817 | 0.0102341 | NA |
| AC009019.1 | 2.9223376 | 1.7187871 | 0.6447397 | 2.6658622 | 0.0076791 | 0.0901477 |
| AC040168.1 | 2.9723405 | 1.6007103 | 0.6315034 | 2.5347612 | 0.0112524 | 0.1135324 |
| DKFZP434H168 | 5.4984964 | 2.5454204 | 0.5169007 | 4.9243898 | 8.46E-07 | 0.0003433 |
| AC009102.1 | 8.1161531 | 1.3017653 | 0.4354968 | 2.98915 | 0.0027975 | 0.0521017 |
| AC026461.3 | 5.7882081 | -1.832253 | 0.5363468 | -3.416172 | 0.0006351 | 0.0243807 |
| AC018552.3 | 4.2493522 | 1.6784047 | 0.5597908 | 2.9982711 | 0.0027152 | 0.0515404 |
| AC026771.1 | 40.079593 | -2.038714 | 0.2872257 | -7.097951 | 1.27E-12 | 6.27E-09 |
| AC092718.6 | 5.7385963 | -1.067371 | 0.4394163 | -2.429066 | 0.0151378 | 0.1369768 |
| LINC02132 | 13.285774 | -1.251445 | 0.4047216 | -3.092113 | 0.0019874 | 0.043474 |
| AC092723.1 | 4.676253 | -1.252269 | 0.549242 | -2.279995 | 0.022608 | 0.1731065 |
| AC010536.2 | 77.775652 | -1.00181 | 0.3286262 | -3.048479 | 0.0023 | 0.0468903 |
| AC116552.1 | 32.579509 | 1.2331971 | 0.2564098 | 4.8094768 | 1.51E-06 | 0.0004998 |
| AC002347.1 | 6.5805834 | 1.0311587 | 0.4574502 | 2.2541442 | 0.0241871 | 0.1767299 |
| AC055811.3 | 11.118673 | -1.292711 | 0.3518089 | -3.67447 | 0.0002383 | 0.0138912 |
| AC010761.4 | 5.5269758 | -1.071425 | 0.4252211 | -2.519689 | 0.0117459 | 0.1172403 |
| AC079336.3 | 2.370106 | 1.5017993 | 0.7034995 | 2.1347553 | 0.032781 | 0.2095127 |
| AC025211.1 | 5.6044289 | 1.1529872 | 0.4937969 | 2.3349422 | 0.0195464 | 0.1587427 |
| AC015911.5 | 11.461561 | 1.1009049 | 0.3204138 | 3.4358849 | 0.0005906 | 0.0231775 |
| AC090844.2 | 25.051401 | 1.2926641 | 0.3684318 | 3.5085578 | 0.0004505 | 0.0195789 |
| AC107993.1 | 4.8272994 | -1.003192 | 0.4733264 | -2.119452 | 0.0340523 | 0.2143002 |
| AC015936.1 | 1.2944396 | -2.578196 | 0.9748393 | -2.644739 | 0.0081754 | NA |
| KANSL1-AS1 | 2.7584649 | 1.4059022 | 0.6205671 | 2.2655118 | 0.0234813 | 0.1751887 |
| HOXB-AS4 | 1.8752641 | 2.0549726 | 0.8819912 | 2.3299241 | 0.0198102 | NA |
| LINC02086 | 10.839569 | 1.0493329 | 0.3966487 | 2.6454969 | 0.0081571 | 0.0926328 |
| AC002546.1 | 10.667634 | 1.3076403 | 0.3830047 | 3.4141622 | 0.0006398 | 0.0243807 |
| AC087289.5 | 2.6910586 | 2.3965508 | 0.935918 | 2.5606419 | 0.0104479 | 0.1091437 |
| AC016168.1 | 4.0969018 | 1.7600039 | 0.6256236 | 2.8131993 | 0.0049051 | 0.0729421 |
| LINC01973 | 8.1021566 | -1.075794 | 0.4002929 | -2.687516 | 0.0071986 | 0.0878125 |
| AP000845.1 | 33.988411 | -1.162013 | 0.2790509 | -4.164163 | 3.12E-05 | 0.0043003 |
| DLGAP1-AS5 | 6.3352079 | 1.6102926 | 0.4985852 | 3.2297243 | 0.0012391 | 0.0334236 |
| AP001033.1 | 5.157227 | 1.0467489 | 0.4615415 | 2.267941 | 0.0233328 | 0.1746083 |
| AC006557.1 | 3.1620173 | 1.7278041 | 0.5987404 | 2.8857317 | 0.003905 | 0.0632209 |
| AC139100.1 | 6.540757 | 1.4620622 | 0.6380886 | 2.2913153 | 0.0219452 | 0.1694988 |
| AC011444.2 | 38.020806 | -1.376853 | 0.390617 | -3.524816 | 0.0004238 | 0.0192605 |
| AC011444.3 | 4.281519 | -1.192655 | 0.5332156 | -2.236721 | 0.0253046 | 0.1811543 |
| AC010422.1 | 1.9269984 | -1.831987 | 0.7389471 | -2.479185 | 0.0131683 | NA |
| AC020916.1 | 1172.3363 | -1.452854 | 0.2342457 | -6.202268 | 5.57E-10 | 1.38E-06 |
| LINC01841 | 22.076613 | -1.005092 | 0.3071261 | -3.272572 | 0.0010657 | 0.0314266 |
| AC020911.2 | 10.491892 | -1.33164 | 0.4497785 | -2.960658 | 0.0030698 | 0.0547048 |
| AC010463.3 | 10.640323 | -1.044249 | 0.3101595 | -3.366812 | 0.0007604 | 0.0267173 |
| AC010618.2 | 3.7819306 | 1.617365 | 0.627671 | 2.5767719 | 0.0099728 | 0.1053414 |
| LINC00664 | 21.753605 | 1.5876999 | 0.7353947 | 2.1589767 | 0.030852 | 0.2021702 |
| AC123912.2 | 31.67146 | 1.8798981 | 0.8208467 | 2.2901937 | 0.0220101 | 0.1694988 |
| AC010300.1 | 22.874069 | 1.5025837 | 0.3589017 | 4.1866161 | 2.83E-05 | 0.0041256 |
| AC005381.1 | 30.068885 | 1.1946133 | 0.5536171 | 2.157833 | 0.0309408 | 0.2024846 |
| AC022148.1 | 3.7089599 | -1.083397 | 0.4913183 | -2.205081 | 0.0274484 | 0.1904472 |
| AC008635.1 | 19.302689 | -1.072382 | 0.3023446 | -3.546887 | 0.0003898 | 0.0180479 |
| MYADM-AS1 | 35.607174 | -1.543537 | 0.3972463 | -3.885591 | 0.0001021 | 0.0084928 |
| AL049712.1 | 5.8396963 | -1.107721 | 0.5429776 | -2.040086 | 0.0413417 | 0.2398922 |
| LINC01597 | 4.7546962 | -1.417469 | 0.6246436 | -2.269244 | 0.0232535 | 0.1745419 |
| AL031658.1 | 3.9481023 | -1.184013 | 0.5771505 | -2.051481 | 0.0402201 | 0.2359169 |
| AL359555.1 | 1.5568128 | 2.0058583 | 0.9921856 | 2.0216563 | 0.0432119 | NA |
| AF130417.1 | 4.3488965 | 1.7476041 | 0.5483315 | 3.1871304 | 0.0014369 | 0.0363189 |
| AP001437.1 | 7.2280365 | -1.060069 | 0.3729888 | -2.842092 | 0.0044819 | 0.069424 |
| AP001434.1 | 13.412407 | 2.0736589 | 0.7868242 | 2.6354793 | 0.0084019 | 0.0943827 |
| BACE2-IT1 | 5.4192395 | 1.2961592 | 0.5442159 | 2.3817004 | 0.0172329 | 0.146687 |
| AP001046.1 | 3.2273323 | -2.091261 | 0.7519422 | -2.781146 | 0.0054167 | 0.0771108 |
| AC002470.1 | 1.9478218 | -2.168078 | 0.8069411 | -2.686786 | 0.0072143 | 0.0878125 |
| NCF4-AS1 | 1.6787115 | 2.9376346 | 0.9598776 | 3.0604264 | 0.0022102 | NA |
| Z83847.1 | 12.51001 | -1.154741 | 0.4045893 | -2.854108 | 0.0043158 | 0.0684271 |
| AL022316.1 | 2.9455574 | -1.961237 | 0.6557559 | -2.990804 | 0.0027824 | 0.0520159 |
| Z82186.1 | 2.885407 | 2.0765431 | 0.6990107 | 2.9706885 | 0.0029713 | 0.0535272 |
| MED14OS | 5.5462487 | -1.072022 | 0.5235729 | -2.047513 | 0.0406078 | 0.2370258 |
| MIR222HG | 3.782742 | -2.255167 | 0.7217726 | -3.124485 | 0.0017812 | 0.0407013 |
| AC233976.1 | 2.4161406 | 1.5232914 | 0.757882 | 2.0099322 | 0.0444384 | 0.2494701 |
| AC234775.2 | 14.961675 | -1.053357 | 0.3687893 | -2.856256 | 0.0042867 | 0.0682838 |
| Z95624.1 | 2.4406307 | -1.43499 | 0.6609106 | -2.171232 | 0.0299136 | 0.1986489 |
| AC004000.1 | 3.724302 | 1.1093777 | 0.538754 | 2.0591546 | 0.0394794 | 0.2322816 |

**Table S4**

The detailed information of DEmRNAs between between the allergic group and non-allergic group.

| **Symbol** | **baseMean** | **log2FoldChange** | **lfcSE** | **stat** | **pvalue** | **padj** |
| --- | --- | --- | --- | --- | --- | --- |
| HES4 | 19.50116805 | -1.400607947 | 0.507194613 | -2.761480332 | 0.005753998 | 0.048044183 |
| AJAP1 | 17.11708662 | -1.255929756 | 0.492723349 | -2.548955226 | 0.010804617 | 0.071012553 |
| CTRC | 20.43051184 | -1.321667366 | 0.367601019 | -3.595385485 | 0.000323912 | 0.007592552 |
| ALPL | 90.2447832 | 1.71445062 | 0.855658031 | 2.003663331 | 0.045106137 | 0.17404777 |
| C1QC | 8.322106457 | -1.754018057 | 0.610056525 | -2.875173011 | 0.004038062 | 0.038552833 |
| TENT5B | 6.000385988 | -1.409919284 | 0.511563481 | -2.756098385 | 0.00584954 | 0.048611812 |
| SPOCD1 | 58.4535042 | 1.12748593 | 0.380982662 | 2.959415332 | 0.003082234 | 0.032385258 |
| FOXO6 | 3.303684612 | -2.469449979 | 0.830438483 | -2.973669969 | 0.002942614 | 0.031314648 |
| MPL | 120.5542743 | 1.048189925 | 0.387330378 | 2.706190849 | 0.006805992 | 0.053236892 |
| AL357673.1 | 0.880475172 | -2.344731462 | 1.118192837 | -2.096893652 | 0.036002991 | NA |
| JUN | 7754.209149 | -1.805815001 | 0.295504535 | -6.110955278 | 9.90E-10 | 4.66E-07 |
| PTGER3 | 100.0449544 | 1.919923978 | 0.577047904 | 3.327148345 | 0.000877397 | 0.014463718 |
| AC093155.3 | 3.146180653 | 1.317770024 | 0.648676024 | 2.031476383 | 0.042206693 | 0.167721386 |
| BRDT | 2.558362668 | 1.824210293 | 0.907020714 | 2.011211282 | 0.044303145 | NA |
| F3 | 45.04955162 | 1.492683573 | 0.686295347 | 2.174987169 | 0.029631078 | 0.134061112 |
| SLC44A3 | 3.509379189 | 1.658567905 | 0.839163927 | 1.976452814 | 0.048103515 | 0.181300401 |
| PIFO | 5.649343223 | -1.64873555 | 0.517616624 | -3.18524459 | 0.001446317 | 0.019989207 |
| RORC | 136.9461682 | 1.071534684 | 0.241886579 | 4.429905481 | 9.43E-06 | 0.00059655 |
| AQP10 | 45.87824766 | 1.277448046 | 0.48589735 | 2.629049212 | 0.008562397 | 0.061269768 |
| GBA | 13.91994377 | -1.363114849 | 0.507075904 | -2.688186989 | 0.007184115 | 0.054856505 |
| LMNA | 944.9045851 | -1.033985121 | 0.218875941 | -4.724069333 | 2.31E-06 | 0.000234185 |
| BCAN | 2.129132057 | 1.669523885 | 0.850889885 | 1.962091587 | 0.049751822 | NA |
| PEAR1 | 280.4371785 | 1.228013641 | 0.338083981 | 3.632273961 | 0.000280935 | 0.006858596 |
| ETV3L | 0.995808345 | 2.500081188 | 1.069277405 | 2.338103447 | 0.019381882 | NA |
| OR6K3 | 2.448017074 | 1.52018813 | 0.707937062 | 2.147349266 | 0.031765486 | NA |
| IGSF9 | 40.42613199 | -1.921308963 | 0.413189896 | -4.649941783 | 3.32E-06 | 0.000300337 |
| FCGR2B | 279.3646423 | 1.027605146 | 0.321409111 | 3.197187354 | 0.001387748 | 0.019562943 |
| FCGR3B | 592.7323474 | 1.904083686 | 0.739246393 | 2.575709133 | 0.010003476 | 0.067443405 |
| SELP | 769.2451872 | 1.189142507 | 0.407515696 | 2.918028728 | 0.003522519 | 0.035179749 |
| CRB1 | 4.955147948 | -1.06453266 | 0.469085665 | -2.269377941 | 0.023245352 | 0.115865478 |
| NR5A2 | 1.924296121 | 1.768658164 | 0.809722682 | 2.184276424 | 0.028941942 | NA |
| PHLDA3 | 4.780292707 | 1.142317784 | 0.509618912 | 2.241513724 | 0.024992818 | 0.121402289 |
| SLC45A3 | 137.4868182 | 1.022207 | 0.276845251 | 3.692340747 | 0.000222199 | 0.005860667 |
| C1orf116 | 47.02780532 | 1.132910498 | 0.388588918 | 2.915447266 | 0.003551791 | 0.035345082 |
| CR1L | 7.355393626 | 1.010605728 | 0.503841686 | 2.005800146 | 0.044877575 | 0.173735929 |
| ATF3 | 708.7268997 | -1.719892981 | 0.26976337 | -6.375561601 | 1.82E-10 | 1.12E-07 |
| TGFB2 | 39.05285832 | 1.56749252 | 0.440913743 | 3.555100166 | 0.000377835 | 0.008337572 |
| DUSP10 | 1398.398798 | -1.632415323 | 0.222760528 | -7.328117488 | 2.33E-13 | 8.23E-10 |
| OR2L13 | 6.101107063 | 1.402466591 | 0.62799675 | 2.233238612 | 0.025533213 | 0.123148458 |
| MYCN | 5.127946922 | -1.448588319 | 0.572042888 | -2.532307192 | 0.011331467 | 0.073415211 |
| RHOB | 1287.984598 | -1.213234528 | 0.268972521 | -4.510626305 | 6.46E-06 | 0.000467548 |
| MFSD2B | 71.83721114 | 1.004177326 | 0.3606494 | 2.784358791 | 0.005363367 | 0.045629491 |
| CGREF1 | 1.813271106 | 2.662566409 | 1.009772177 | 2.636799141 | 0.008369237 | NA |
| LTBP1 | 1160.924808 | 1.146077246 | 0.439613453 | 2.607011317 | 0.009133634 | 0.063514952 |
| LGALSL | 668.1623157 | 1.150232469 | 0.420944197 | 2.732505823 | 0.006285456 | 0.050682326 |
| IL1R2 | 83.63897532 | 1.290924963 | 0.654841757 | 1.971354072 | 0.048683391 | 0.182608007 |
| LIMS3 | 1.249289668 | 2.42445212 | 1.008761154 | 2.403395601 | 0.016243604 | NA |
| MARCO | 62.57106983 | -1.06325442 | 0.370808981 | -2.867391226 | 0.00413871 | 0.039142992 |
| POTEI | 1.270601061 | 2.470718973 | 1.018289015 | 2.426343539 | 0.015251825 | NA |
| RND3 | 1.762115665 | -2.22322877 | 1.094132955 | -2.031954855 | 0.042158226 | NA |
| GALNT5 | 16.28566865 | -1.074854978 | 0.366316852 | -2.934222035 | 0.003343849 | 0.033933693 |
| SLC4A10 | 322.9317649 | 1.050632146 | 0.327626781 | 3.206795681 | 0.001342223 | 0.019131421 |
| KCNH7 | 4.004058542 | 1.375275958 | 0.513730472 | 2.677037929 | 0.007427623 | 0.056018804 |
| B3GALT1 | 1.461518857 | -2.257869391 | 0.999330985 | -2.259380952 | 0.023859698 | NA |
| NOSTRIN | 4.042283705 | -1.504914952 | 0.569524751 | -2.642404828 | 0.00823196 | 0.059753695 |
| CCDC173 | 39.74977103 | -2.28993644 | 0.340162071 | -6.731898225 | 1.67E-11 | 1.48E-08 |
| MYO3B | 77.55859036 | 1.311943174 | 0.351999439 | 3.727117225 | 0.000193682 | 0.005398542 |
| MPP4 | 1.818617546 | -1.947780424 | 0.855004489 | -2.278093797 | 0.02272099 | NA |
| GPR1 | 5.261877809 | 1.677161159 | 0.61059539 | 2.746763548 | 0.006018651 | 0.049463705 |
| CXCR2 | 415.3876736 | 1.292365128 | 0.514547511 | 2.511653641 | 0.012016696 | 0.076208438 |
| CXCR1 | 234.1420249 | 1.542412245 | 0.528416604 | 2.918932209 | 0.003512326 | 0.035125749 |
| PRKAG3 | 7.785194916 | -1.423349502 | 0.58581704 | -2.429682657 | 0.015112048 | 0.08793654 |
| SLC23A3 | 31.29305477 | 1.221735221 | 0.260183424 | 4.69566894 | 2.66E-06 | 0.000256835 |
| TM4SF20 | 5.40681727 | 1.445964608 | 0.655988799 | 2.20425198 | 0.027506628 | 0.128272513 |
| COL6A3 | 106.4858401 | 1.064187702 | 0.322179608 | 3.303088322 | 0.000956263 | 0.015247257 |
| CNTN4 | 1.371757759 | 3.038063962 | 1.033549701 | 2.939446414 | 0.003287991 | NA |
| CTDSPL | 512.9786239 | 1.025067531 | 0.372188314 | 2.754163665 | 0.005884233 | 0.048813885 |
| XIRP1 | 1.116138614 | 2.701016919 | 1.10610078 | 2.441926602 | 0.014609116 | NA |
| TMEM158 | 35.99184225 | 1.050841617 | 0.430627827 | 2.440254789 | 0.014676906 | 0.086114474 |
| CCR5 | 423.6342632 | 1.062735361 | 0.229577503 | 4.629091906 | 3.67E-06 | 0.000323912 |
| KIF9 | 89.76048517 | -1.196336953 | 0.178696827 | -6.694785649 | 2.16E-11 | 1.60E-08 |
| CISH | 323.0319611 | 1.132714833 | 0.47555705 | 2.381869499 | 0.017225 | 0.095318424 |
| DCAF1 | 16.97315267 | -2.378393652 | 0.642073198 | -3.70424067 | 0.000212025 | 0.005687991 |
| PROS1 | 273.3075152 | 1.248020854 | 0.458616553 | 2.721273026 | 0.006503103 | 0.051683362 |
| DRD3 | 2.274561053 | 1.642236673 | 0.790292479 | 2.078011264 | 0.037708322 | NA |
| PLA1A | 25.47705358 | -1.486919051 | 0.419801833 | -3.541954639 | 0.000397174 | 0.008582724 |
| ITGB5 | 440.2283591 | 1.155115451 | 0.410002871 | 2.817335027 | 0.004842398 | 0.043148003 |
| RAB6B | 151.7397337 | 1.194240668 | 0.227991986 | 5.238081785 | 1.62E-07 | 3.16E-05 |
| KY | 36.93713447 | 1.479035079 | 0.540640797 | 2.735707492 | 0.006224633 | 0.050364562 |
| ARHGEF26 | 33.19600286 | 1.208726809 | 0.235071283 | 5.141958621 | 2.72E-07 | 4.41E-05 |
| MME | 276.8944277 | 1.527530411 | 0.74800526 | 2.042138596 | 0.041137785 | 0.164773003 |
| VEPH1 | 119.4557945 | 1.021794957 | 0.353826154 | 2.887844622 | 0.003878914 | 0.037541399 |
| MLF1 | 35.1470642 | -1.655907465 | 0.265064522 | -6.247186363 | 4.18E-10 | 2.11E-07 |
| ACTRT3 | 1.091741211 | -2.225073138 | 1.062908297 | -2.093382038 | 0.036315065 | NA |
| LIPH | 48.32702095 | 1.058002725 | 0.312748204 | 3.382921827 | 0.00071719 | 0.012683207 |
| ETV5 | 21.14642787 | -1.173937344 | 0.337951408 | -3.473686791 | 0.00051336 | 0.01006404 |
| PLAAT1 | 12.67157327 | 1.068868854 | 0.437732886 | 2.441828998 | 0.014613067 | 0.085864111 |
| CFAP99 | 4.150662564 | -1.138281418 | 0.499088976 | -2.280718414 | 0.022565115 | 0.11372012 |
| CYTL1 | 3.76124673 | -2.057818263 | 0.624598797 | -3.294624121 | 0.000985534 | 0.015608161 |
| S100P | 43.75029199 | 1.234494649 | 0.477575126 | 2.584922416 | 0.009740091 | 0.066173532 |
| LDB2 | 23.04633157 | -1.153187972 | 0.423313306 | -2.724194952 | 0.006445845 | 0.051586572 |
| RASL11B | 7.619708879 | 1.096385544 | 0.392093683 | 2.796233637 | 0.005170201 | 0.044781972 |
| CRACD | 36.22277267 | 1.130197418 | 0.335656399 | 3.367126091 | 0.00075956 | 0.013173117 |
| JCHAIN | 2067.359714 | 1.112350938 | 0.493833094 | 2.252483588 | 0.024291729 | 0.119435744 |
| PF4V1 | 305.093392 | 1.21963504 | 0.57687034 | 2.114227331 | 0.034495856 | 0.147461684 |
| CXCL1 | 71.62088383 | 1.666998607 | 0.567575933 | 2.937049494 | 0.003313512 | 0.033857339 |
| PF4 | 1574.960661 | 1.112150584 | 0.432324891 | 2.572487976 | 0.010097046 | 0.067782788 |
| PPBP | 8292.76506 | 1.034733951 | 0.43278069 | 2.390896764 | 0.016807278 | 0.094163941 |
| CXCL5 | 319.0845563 | 1.285509652 | 0.322029447 | 3.991900945 | 6.55E-05 | 0.002469549 |
| CXCL3 | 96.62437022 | 2.082505346 | 0.426423612 | 4.883653924 | 1.04E-06 | 0.00012668 |
| CXCL2 | 323.9793738 | 1.243480998 | 0.486765154 | 2.554580969 | 0.01063157 | 0.070179208 |
| CXCL9 | 16.66295616 | -1.30207131 | 0.46764989 | -2.784286574 | 0.005364561 | 0.045629491 |
| CXCL10 | 73.36661819 | -1.386662173 | 0.652087196 | -2.126498083 | 0.033461809 | 0.145189042 |
| SHROOM3 | 2.211356846 | -2.28057889 | 0.907921605 | -2.51186763 | 0.012009413 | NA |
| MAPK10 | 15.58887197 | 1.119818216 | 0.55145695 | 2.030653916 | 0.042290114 | 0.167879383 |
| MMRN1 | 621.3871904 | 1.336258804 | 0.542151837 | 2.46473167 | 0.013711589 | 0.08289813 |
| EGF | 370.0544917 | 1.107351336 | 0.418583501 | 2.645472967 | 0.008157681 | 0.059336613 |
| PRDM5 | 28.75802196 | 1.009661309 | 0.46359413 | 2.177899254 | 0.029413538 | 0.133672926 |
| GUCY1B1 | 475.1295108 | 1.080272575 | 0.399243747 | 2.705797108 | 0.006814066 | 0.053270521 |
| VEGFC | 14.68267486 | 1.055551493 | 0.356812554 | 2.958280137 | 0.003093608 | 0.032432324 |
| TENM3 | 1.483894248 | -2.766373823 | 0.995261335 | -2.779545156 | 0.005443508 | NA |
| C4orf47 | 6.121667074 | -1.563309454 | 0.583897385 | -2.677370191 | 0.00742026 | 0.055993202 |
| CDH6 | 5.604992521 | 1.726670171 | 0.605782086 | 2.850315666 | 0.004367586 | 0.04055057 |
| FST | 1.839479856 | -2.724984129 | 1.018003769 | -2.676791787 | 0.007433081 | NA |
| GPX8 | 1.700853322 | -2.55351573 | 0.932203407 | -2.739225916 | 0.006158404 | NA |
| IL31RA | 89.41236281 | -1.044076741 | 0.433751413 | -2.40708551 | 0.016080404 | 0.091348866 |
| RAB3C | 12.04380258 | 1.031322247 | 0.433967313 | 2.376497529 | 0.017477878 | 0.096189681 |
| AK6 | 2.593039098 | -2.914874005 | 1.159731166 | -2.513404909 | 0.011957201 | NA |
| GTF2H2C | 17.78330803 | -1.141203616 | 0.545353083 | -2.092595881 | 0.036385245 | 0.152534815 |
| ARHGEF28 | 70.51467412 | 1.038446461 | 0.334645461 | 3.103124296 | 0.001914892 | 0.023870177 |
| CKMT2 | 34.30195453 | 1.127919067 | 0.332644434 | 3.390764892 | 0.000696979 | 0.012407991 |
| PPIP5K2 | 30.35188532 | 1.130673275 | 0.476546176 | 2.372641587 | 0.017661393 | 0.09674686 |
| TMED7-TICAM2 | 3.409480712 | -1.452628534 | 0.650178638 | -2.234199111 | 0.025469975 | 0.122916148 |
| CDO1 | 5.932553193 | 1.772652595 | 0.762689795 | 2.324211764 | 0.020114147 | 0.105946521 |
| PRR16 | 7.083243374 | 1.114179168 | 0.500924139 | 2.224247308 | 0.02613181 | 0.124956275 |
| PCDHGB3 | 21.03364185 | 1.172480156 | 0.430678412 | 2.722402895 | 0.006480908 | 0.051670319 |
| HTR4 | 2.702792843 | 1.50044629 | 0.645190052 | 2.325588073 | 0.020040536 | NA |
| SH3TC2 | 164.4726712 | 1.112797105 | 0.306776528 | 3.627386721 | 0.000286304 | 0.006965587 |
| ABLIM3 | 361.7793441 | 1.17397269 | 0.383725034 | 3.059411262 | 0.002217725 | 0.026091247 |
| SLC6A7 | 2.620070905 | -1.493738777 | 0.755054837 | -1.978318266 | 0.047892814 | NA |
| SGCD | 110.7444873 | 1.021589645 | 0.486449401 | 2.100094362 | 0.035720541 | 0.150823626 |
| BTNL8 | 10.78085986 | 1.540404439 | 0.778822145 | 1.9778642 | 0.047944029 | 0.180932696 |
| FAM50B | 27.15534917 | 1.025520839 | 0.324056152 | 3.164639318 | 0.001552753 | 0.021059621 |
| CAGE1 | 5.316514362 | -1.360317112 | 0.690429027 | -1.970249017 | 0.048809838 | 0.182817981 |
| ELOVL2 | 3.61857381 | 1.633953445 | 0.630874921 | 2.589980028 | 0.00959815 | 0.06572072 |
| ABT1 | 7.073690959 | -1.82233735 | 0.637584783 | -2.858188271 | 0.004260675 | 0.040001588 |
| TCF19 | 13.14505688 | 1.629227591 | 0.823686235 | 1.977971127 | 0.047931964 | 0.180932696 |
| ATF6B | 7.041755541 | 3.480950239 | 1.128340752 | 3.085016855 | 0.002035406 | 0.02477153 |
| HLA-DRB5 | 628.8578717 | -4.968557968 | 1.293693187 | -3.840599935 | 0.000122734 | 0.003876223 |
| TAP2 | 6.285925305 | 3.022740164 | 1.086390485 | 2.782369881 | 0.00539635 | 0.045817024 |
| TREML1 | 855.7936848 | 1.147412974 | 0.434557746 | 2.64041542 | 0.008280446 | 0.059951448 |
| CAPN11 | 6.061475662 | 1.18545431 | 0.594263925 | 1.994827989 | 0.046061644 | 0.17638422 |
| RCAN2 | 25.0310322 | 1.625662235 | 0.382576369 | 4.249248949 | 2.14E-05 | 0.001092652 |
| SLC25A27 | 7.759785018 | -1.039299669 | 0.399401465 | -2.602142857 | 0.009264325 | 0.064122983 |
| MYO6 | 256.5473174 | 1.225533867 | 0.282748608 | 4.334358625 | 1.46E-05 | 0.000828237 |
| IMPG1 | 1.443068717 | 2.272217235 | 1.008409855 | 2.253267582 | 0.024242282 | NA |
| SH3BGRL2 | 2150.949846 | 1.313163837 | 0.396691316 | 3.310291363 | 0.000931989 | 0.015012896 |
| NKAIN2 | 5.834125266 | 1.583758015 | 0.707050235 | 2.239951188 | 0.025094092 | 0.121662609 |
| TPD52L1 | 4.289978883 | 1.526522107 | 0.727032415 | 2.099661688 | 0.035758612 | 0.150939209 |
| KIAA0408 | 2.956251511 | 1.353751074 | 0.685214575 | 1.97566007 | 0.04819329 | 0.181493333 |
| TMEM244 | 6.459184013 | 1.550713723 | 0.515470224 | 3.008347815 | 0.002626723 | 0.029139695 |
| ENPP3 | 165.9521233 | 1.140410242 | 0.382340569 | 2.982707918 | 0.002857105 | 0.030729124 |
| CTAGE9 | 12.23289934 | 1.32554935 | 0.545629509 | 2.429394541 | 0.015124064 | 0.087970185 |
| SLC35D3 | 9.199434189 | 1.656346713 | 0.478503275 | 3.461515937 | 0.000537142 | 0.010397277 |
| SASH1 | 195.3919461 | -1.113003537 | 0.297224745 | -3.744653013 | 0.000180643 | 0.00514961 |
| SLC22A3 | 5.937399985 | 1.192727367 | 0.432719676 | 2.756351125 | 0.005845021 | 0.048602886 |
| TCP10L2 | 1.858717596 | 2.026855541 | 0.948063558 | 2.137889937 | 0.032525677 | NA |
| RSPH10B2 | 1.549335813 | 2.379231529 | 1.053640788 | 2.258104997 | 0.023939114 | NA |
| ARL4A | 577.6049037 | -1.261248927 | 0.192099253 | -6.565610771 | 5.18E-11 | 3.66E-08 |
| GPNMB | 22.53499423 | -1.021329521 | 0.453233093 | -2.253431044 | 0.024231984 | 0.119266664 |
| HOXA5 | 9.26275736 | -1.399213298 | 0.438002031 | -3.194536097 | 0.001400558 | 0.019635298 |
| HOXA10 | 6.371268444 | 1.000197015 | 0.498972499 | 2.004513309 | 0.045015103 | 0.173934314 |
| AMPH | 42.11929761 | 1.073134124 | 0.283167572 | 3.789749353 | 0.000150799 | 0.00452751 |
| CAMK2B | 4.559427464 | -2.150894739 | 1.067963757 | -2.014014731 | 0.044007987 | 0.172212064 |
| EIF4H | 191.281087 | -1.237853774 | 0.578150621 | -2.141057588 | 0.032269394 | 0.141854649 |
| RHBDD2 | 17.42762307 | -1.383654832 | 0.589434736 | -2.347426691 | 0.018903593 | 0.101463901 |
| CFAP69 | 5.280008036 | -1.54974072 | 0.517499494 | -2.994670987 | 0.00274741 | 0.029868032 |
| GNG11 | 403.0747091 | 1.157446081 | 0.401516736 | 2.882684524 | 0.003943021 | 0.037844109 |
| DYNC1I1 | 12.45441609 | 1.445474901 | 0.467947597 | 3.088967465 | 0.002008534 | 0.024568802 |
| BHLHA15 | 7.761051132 | 1.354427403 | 0.506196141 | 2.675696816 | 0.007457407 | 0.056123453 |
| LRRC17 | 7.130054807 | 1.046828959 | 0.452347416 | 2.314214522 | 0.020655958 | 0.107635237 |
| PRKAR2B | 3113.285265 | 1.12744295 | 0.381394844 | 2.956104329 | 0.003115517 | 0.032541124 |
| CAV2 | 26.64847002 | 1.260471463 | 0.416484035 | 3.026458056 | 0.002474371 | 0.028067408 |
| CTTNBP2 | 9.063981957 | -1.503785527 | 0.581038139 | -2.588101239 | 0.009650661 | 0.065883155 |
| CALD1 | 259.2161608 | 1.018471847 | 0.447394169 | 2.276453108 | 0.022818904 | 0.114589878 |
| TAS2R40 | 1.822883292 | 1.662187032 | 0.823296264 | 2.018941547 | 0.043493295 | NA |
| CLCN1 | 2.655997381 | -1.972852966 | 0.923254744 | -2.13684574 | 0.03261054 | NA |
| LPL | 17.30059418 | -1.121240729 | 0.498993053 | -2.24700669 | 0.0246396 | 0.120307747 |
| GFRA2 | 23.13698422 | -1.024826129 | 0.359383862 | -2.851619778 | 0.00434971 | 0.040460614 |
| EGR3 | 134.9830879 | 1.496210345 | 0.329236293 | 4.544487893 | 5.51E-06 | 0.000422325 |
| CLU | 2121.034264 | 1.002800696 | 0.354134997 | 2.831690469 | 0.004630265 | 0.041990788 |
| ZNF703 | 234.8316478 | -1.158876684 | 0.234939869 | -4.932652306 | 8.11E-07 | 0.000107808 |
| LETM2 | 123.8596974 | -1.362499962 | 0.263228969 | -5.176101887 | 2.27E-07 | 3.85E-05 |
| TRPA1 | 33.28933632 | 1.240431584 | 0.354061302 | 3.503437331 | 0.000459295 | 0.009378374 |
| CRISPLD1 | 1.730680339 | 2.174420934 | 0.854633143 | 2.544274056 | 0.010950513 | NA |
| SDC2 | 20.43496625 | 1.038397499 | 0.507901051 | 2.044487792 | 0.040905382 | 0.164261767 |
| OSR2 | 6.405725551 | -2.27135804 | 0.723821177 | -3.138009927 | 0.001700991 | 0.022142699 |
| GRHL2 | 12.36267029 | 1.125387508 | 0.420194947 | 2.678250931 | 0.007400775 | 0.05587605 |
| CTHRC1 | 6.660946992 | 1.201452903 | 0.444977753 | 2.700029148 | 0.00693334 | 0.053621118 |
| ZFPM2 | 3.133381528 | 1.803607986 | 0.804928281 | 2.240706444 | 0.025045096 | 0.121614369 |
| PKHD1L1 | 537.8100894 | 1.174761377 | 0.433747936 | 2.708396466 | 0.00676092 | 0.053031321 |
| HAS2 | 0.984159448 | -2.072698778 | 1.054673844 | -1.965250954 | 0.049385199 | NA |
| KCNQ3 | 5.777284242 | 1.298578043 | 0.489196178 | 2.654513875 | 0.007942277 | 0.05846295 |
| NFIB | 36.43089211 | 1.331283089 | 0.589142151 | 2.259697572 | 0.023840027 | 0.117954636 |
| ADAMTSL1 | 1.088960787 | 2.663069241 | 1.121113292 | 2.375379241 | 0.017530928 | NA |
| AQP7 | 3.920104737 | 1.071557248 | 0.535766305 | 2.000045985 | 0.045495299 | 0.174954899 |
| CCIN | 34.23462052 | -1.048494616 | 0.287798476 | -3.643155546 | 0.000269316 | 0.006667224 |
| CNTNAP3 | 28.39586027 | 3.090787927 | 1.028310781 | 3.005694371 | 0.002649752 | 0.029325999 |
| ANXA1 | 8348.234553 | -1.067151605 | 0.174925609 | -6.100602491 | 1.06E-09 | 4.81E-07 |
| RORB | 21.05309888 | 1.207347972 | 0.344650255 | 3.503110629 | 0.000459858 | 0.009378374 |
| SLC28A3 | 17.89935136 | -1.035807504 | 0.500875976 | -2.067991987 | 0.038640777 | 0.15845975 |
| CDC14B | 546.9167046 | 1.06280647 | 0.246673125 | 4.308562068 | 1.64E-05 | 0.000895255 |
| PGAP4 | 1.975007695 | -2.49038202 | 0.857529172 | -2.904136793 | 0.003682672 | NA |
| KLF4 | 1559.55364 | -1.745560408 | 0.239582007 | -7.285857698 | 3.20E-13 | 9.02E-10 |
| SLC31A2 | 201.4770955 | -1.100650937 | 0.252980318 | -4.350737428 | 1.36E-05 | 0.000791152 |
| PTGES | 15.15116085 | -1.416476558 | 0.46326938 | -3.057565682 | 0.002231427 | 0.026195671 |
| SURF1 | 46.06267522 | -1.665028463 | 0.545587984 | -3.051805598 | 0.002274694 | 0.026549382 |
| KLF6 | 17975.62365 | -1.244732318 | 0.195811275 | -6.356795936 | 2.06E-10 | 1.21E-07 |
| CCDC3 | 12.0078001 | 1.300735411 | 0.572401787 | 2.272416754 | 0.023061351 | 0.115437645 |
| KIAA1217 | 6.349458566 | 1.540045916 | 0.578439106 | 2.662416668 | 0.007758178 | 0.057649102 |
| PRKG1 | 65.85309254 | 1.549243263 | 0.351603405 | 4.406223715 | 1.05E-05 | 0.000651014 |
| RHOBTB1 | 324.0299701 | 1.144884438 | 0.301337934 | 3.799337251 | 0.000145084 | 0.004412228 |
| STOX1 | 11.78700676 | 1.891785388 | 0.602376797 | 3.140534959 | 0.001686396 | 0.022059051 |
| COL13A1 | 34.03261647 | -1.153433852 | 0.349721905 | -3.298145854 | 0.000973256 | 0.015465778 |
| AC022400.5 | 2.296662401 | -1.436857389 | 0.714475487 | -2.011066039 | 0.044318482 | NA |
| NUTM2E | 8.941876915 | 1.073521833 | 0.44486771 | 2.413125988 | 0.015816351 | 0.090614914 |
| FFAR4 | 1.951451505 | -1.884820443 | 0.894479455 | -2.107170191 | 0.03510283 | NA |
| RRP12 | 1441.88878 | -1.046030225 | 0.193351982 | -5.409979321 | 6.30E-08 | 1.41E-05 |
| CFAP43 | 18.86152779 | -1.147014339 | 0.32484343 | -3.530975952 | 0.000414029 | 0.008785671 |
| RBM20 | 27.10124246 | -1.303430616 | 0.388394628 | -3.355943988 | 0.000790946 | 0.013604291 |
| ADRA2A | 30.8444283 | 1.465712938 | 0.517015608 | 2.834949112 | 0.004583299 | 0.041747123 |
| FGFR2 | 36.84981184 | 1.400437523 | 0.343397831 | 4.078178124 | 4.54E-05 | 0.001894965 |
| HTRA1 | 10.6781421 | -1.259325718 | 0.424618258 | -2.965783249 | 0.003019132 | 0.03188845 |
| TCERG1L | 12.146558 | 1.054489919 | 0.502789545 | 2.097278932 | 0.035968891 | 0.151600065 |
| IFITM10 | 38.39466793 | -1.244295502 | 0.288920524 | -4.30670513 | 1.66E-05 | 0.000899328 |
| CAVIN3 | 3.704312282 | -1.634578079 | 0.781299955 | -2.092126166 | 0.036427231 | 0.152574846 |
| C11orf16 | 2.370150608 | 2.131831781 | 0.756700272 | 2.817273706 | 0.004843323 | NA |
| MAPK8IP1 | 63.57576944 | -1.215559129 | 0.266538556 | -4.560537693 | 5.10E-06 | 0.000402225 |
| OR5B21 | 4.854865399 | 1.592975093 | 0.590732965 | 2.696607751 | 0.007004973 | 0.054014849 |
| GLYATL2 | 3.563574408 | 2.175189588 | 0.7638144 | 2.847798612 | 0.004402277 | 0.040734777 |
| SNX15 | 14.86566981 | 1.019536519 | 0.418373948 | 2.436902499 | 0.014813673 | 0.086808862 |
| SPDYC | 12.10470133 | 1.599868905 | 0.655673661 | 2.440038391 | 0.014685701 | 0.086114474 |
| MYEOV | 38.08061788 | 1.071596519 | 0.338569802 | 3.165068211 | 0.001550466 | 0.021059621 |
| P2RY2 | 131.8948975 | -1.074546467 | 0.2733099 | -3.931604618 | 8.44E-05 | 0.002937155 |
| P4HA3 | 6.118560576 | 1.16870744 | 0.451810445 | 2.586720721 | 0.009689409 | 0.066005341 |
| TENM4 | 7.828012944 | -2.327919323 | 0.951584753 | -2.446360471 | 0.014430664 | 0.085165663 |
| CCDC89 | 10.307919 | 1.071331089 | 0.408022496 | 2.625666723 | 0.008647945 | 0.061600044 |
| TRPC6 | 30.43275525 | 1.232741454 | 0.289830244 | 4.253322347 | 2.11E-05 | 0.001084704 |
| ANGPTL5 | 3.759193381 | -1.299674532 | 0.636943905 | -2.040485076 | 0.041302036 | 0.165102841 |
| SCN4B | 5.146756539 | -1.39202294 | 0.533598692 | -2.608745036 | 0.009087492 | 0.063442432 |
| ARCN1 | 60.02594386 | 1.389946067 | 0.385616268 | 3.604479845 | 0.000312779 | 0.00741785 |
| USP2 | 11.63413036 | -1.263802892 | 0.400676539 | -3.154172429 | 0.00160954 | 0.021463357 |
| TSPAN9 | 205.6266841 | 1.085586212 | 0.32748044 | 3.314965052 | 0.000916546 | 0.014818 |
| VWF | 205.6416599 | 1.278111069 | 0.471979768 | 2.707978509 | 0.006769441 | 0.053068653 |
| EMG1 | 11.2858344 | -1.365039988 | 0.529389398 | -2.578517806 | 0.009922519 | 0.067154273 |
| SLC2A14 | 15.90442138 | -2.329095087 | 1.048201554 | -2.221991637 | 0.026283871 | 0.125343596 |
| CD69 | 6878.728353 | -1.038164085 | 0.339876434 | -3.05453389 | 0.002254105 | 0.026352678 |
| OLR1 | 137.0222659 | 1.518111323 | 0.644321201 | 2.356140571 | 0.018465928 | 0.099683518 |
| GPRC5D | 23.27999603 | 1.329836816 | 0.586709216 | 2.26660291 | 0.023414494 | 0.116557565 |
| EMP1 | 136.7669681 | -1.535550074 | 0.475887028 | -3.226711349 | 0.001252217 | 0.018273047 |
| PDE3A | 177.7586821 | 1.188976229 | 0.376121957 | 3.16114549 | 0.0015715 | 0.021198663 |
| SPX | 130.4337568 | 1.224441258 | 0.461889623 | 2.650939094 | 0.008026831 | 0.058778733 |
| OVCH1 | 11.99014603 | 1.935769068 | 0.786398915 | 2.461561215 | 0.013833379 | 0.083270395 |
| DDX11 | 252.2700465 | 1.033547324 | 0.489223916 | 2.112626327 | 0.034632764 | 0.147706089 |
| CCDC184 | 17.89301651 | -1.367462724 | 0.442755962 | -3.088524697 | 0.00201153 | 0.024571879 |
| FAM186A | 7.024201371 | 1.149377066 | 0.454308587 | 2.529947921 | 0.011407946 | 0.073741867 |
| KRT8 | 8.430027612 | 1.340404552 | 0.553981354 | 2.419584239 | 0.015538261 | 0.089421046 |
| ATF7-NPFF | 3.091705072 | 1.355726293 | 0.684518234 | 1.980555413 | 0.047641153 | 0.18023172 |
| GLI1 | 188.8483504 | -1.036919989 | 0.270965182 | -3.826764688 | 0.000129839 | 0.004071448 |
| DDIT3 | 572.8507734 | -1.589793987 | 0.316361704 | -5.02524157 | 5.03E-07 | 7.02E-05 |
| IFNG | 255.7993454 | -1.597704046 | 0.341117373 | -4.683736951 | 2.82E-06 | 0.000268578 |
| TRHDE | 16.26976505 | 1.127023194 | 0.560111394 | 2.012141167 | 0.044205058 | 0.172593884 |
| SOCS2 | 332.3329709 | 1.090365023 | 0.321575306 | 3.390698855 | 0.000697147 | 0.012407991 |
| NTN4 | 79.57289082 | 1.560150868 | 0.388676622 | 4.014007482 | 5.97E-05 | 0.002301576 |
| CFAP54 | 12.41420636 | 1.032740194 | 0.335924703 | 3.074320479 | 0.002109827 | 0.025285259 |
| ANKS1B | 8.54728991 | 1.00606076 | 0.408875345 | 2.460556187 | 0.013872185 | 0.083395051 |
| NUAK1 | 84.2758815 | 1.072632214 | 0.394225301 | 2.720860915 | 0.006511215 | 0.051683362 |
| SDSL | 10.59834723 | -1.168799975 | 0.436986165 | -2.674684162 | 0.007479968 | 0.056203317 |
| TNFRSF19 | 5.430439385 | 1.168489776 | 0.538345006 | 2.170522182 | 0.02996731 | 0.134929391 |
| WASF3 | 127.6748971 | 1.061376432 | 0.37488642 | 2.831194664 | 0.004637449 | 0.042001951 |
| CCNA1 | 20.29749195 | 1.04292109 | 0.497830753 | 2.094931024 | 0.036177125 | 0.152159584 |
| RGCC | 1088.740777 | -1.588292406 | 0.228567117 | -6.948910359 | 3.68E-12 | 5.77E-09 |
| HTR2A | 5.844687168 | 1.288208374 | 0.493193979 | 2.61197101 | 0.009002189 | 0.063048842 |
| CMTM5 | 157.2512026 | 1.214909912 | 0.359076406 | 3.383430078 | 0.000715864 | 0.012683207 |
| LGALS3 | 642.5739269 | -1.012360784 | 0.201077593 | -5.034677247 | 4.79E-07 | 6.89E-05 |
| RGS6 | 121.5657905 | 1.080221296 | 0.309959523 | 3.485039871 | 0.000492064 | 0.009788956 |
| FOS | 12169.44824 | -1.59120487 | 0.485869655 | -3.274962438 | 0.00105676 | 0.016323337 |
| AL928654.3 | 0.999466109 | -2.08558549 | 1.002032878 | -2.081354351 | 0.037401484 | NA |
| OCA2 | 4.595531564 | -1.755504905 | 0.622905458 | -2.818252566 | 0.004828581 | 0.043096843 |
| NUTM1 | 1.70793945 | 2.521095926 | 0.960702735 | 2.62422062 | 0.008684751 | NA |
| MEIS2 | 2.598893747 | 1.474777525 | 0.67807146 | 2.174958852 | 0.0296332 | NA |
| PRTG | 1.734049587 | -2.595770597 | 0.99836163 | -2.600030408 | 0.00932155 | NA |
| GCOM1 | 23.68053387 | 1.640854541 | 0.815092108 | 2.013090946 | 0.044105063 | 0.172305243 |
| C2CD4A | 2.105582136 | 1.645633878 | 0.81648827 | 2.015502168 | 0.043852059 | NA |
| RBPMS2 | 107.296141 | 2.021478183 | 0.418840761 | 4.826364501 | 1.39E-06 | 0.000155723 |
| ODF3L1 | 2.371458578 | -1.935128884 | 0.864444555 | -2.238580683 | 0.025183212 | NA |
| KIF7 | 6.569150354 | -1.077759609 | 0.424453289 | -2.539171297 | 0.01111154 | 0.072523102 |
| ALDH1A3 | 2.454589324 | -1.814383961 | 0.727284399 | -2.494737911 | 0.012605019 | NA |
| PCSK6 | 259.5155814 | 1.222090606 | 0.436474332 | 2.799914028 | 0.005111622 | 0.04463496 |
| PDIA2 | 5.387425605 | 1.108938363 | 0.561463538 | 1.975085271 | 0.048258472 | 0.181593413 |
| MSLNL | 1.441547515 | 1.852887011 | 0.903461504 | 2.050875442 | 0.040279078 | NA |
| NPW | 3.923945039 | -1.530758819 | 0.598032867 | -2.559656673 | 0.010477562 | 0.069448808 |
| KREMEN2 | 1.653655661 | 2.507056209 | 1.118182489 | 2.242081444 | 0.024956109 | NA |
| SEC14L5 | 187.4448289 | 1.265235181 | 0.485234495 | 2.607471633 | 0.009121363 | 0.063514952 |
| TNFRSF17 | 57.30821706 | 1.143884268 | 0.393573527 | 2.906405512 | 0.003656073 | 0.036128043 |
| AC138969.1 | 10.62229498 | -1.849958833 | 0.721062959 | -2.565599592 | 0.010299765 | 0.068621332 |
| SLC5A11 | 10.57987337 | 1.978691714 | 0.47591208 | 4.157683319 | 3.21E-05 | 0.001463408 |
| CES1 | 11.00678505 | -1.945520391 | 0.783862593 | -2.481966109 | 0.01306597 | 0.080407285 |
| CFAP20 | 408.9056424 | -1.602437429 | 0.171502907 | -9.343500124 | 9.32E-21 | 1.32E-16 |
| CA7 | 1.502326724 | 1.924270008 | 0.971644079 | 1.980426834 | 0.047655587 | NA |
| EXOC3L1 | 7.665152294 | -1.52860176 | 0.41926277 | -3.645927732 | 0.000266429 | 0.006634594 |
| ZDHHC1 | 25.66769255 | -1.877182583 | 0.277424862 | -6.766454061 | 1.32E-11 | 1.41E-08 |
| ALOX15B | 13.62067729 | -1.079785578 | 0.443126956 | -2.436740901 | 0.014820294 | 0.086811611 |
| USP43 | 13.49794915 | -1.113979858 | 0.391697518 | -2.843979877 | 0.004455386 | 0.041064634 |
| LGALS9C | 27.72913807 | -1.394367004 | 0.452809005 | -3.079371187 | 0.002074381 | 0.025066586 |
| SLC47A2 | 7.486700719 | 1.070871136 | 0.41154175 | 2.602095983 | 0.009265592 | 0.064122983 |
| RHBDL3 | 4.042536714 | -1.853513347 | 0.816749492 | -2.269378023 | 0.023245347 | 0.115865478 |
| PTGES3L | 14.40851022 | 1.286426603 | 0.43843812 | 2.934112123 | 0.003345033 | 0.033933693 |
| CFAP97D1 | 2.05394888 | 1.898917753 | 0.903457374 | 2.101834361 | 0.035567788 | NA |
| ITGA2B | 2384.023127 | 1.264802902 | 0.456620742 | 2.769919949 | 0.005607007 | 0.047179772 |
| ITGB3 | 2369.165072 | 1.278843416 | 0.460537217 | 2.776851399 | 0.005488827 | 0.046434553 |
| SAMD14 | 89.18798622 | 1.001142364 | 0.279516721 | 3.581690424 | 0.000341378 | 0.007843277 |
| LPO | 3.999359398 | -1.417093251 | 0.576315542 | -2.458884324 | 0.013936952 | 0.08344922 |
| PPM1E | 2.622270772 | 1.675972874 | 0.676899439 | 2.475955477 | 0.013288015 | NA |
| FOXJ1 | 4.862818821 | -1.531605496 | 0.632119496 | -2.422968294 | 0.01539427 | 0.088882384 |
| C1QTNF1 | 1.486462056 | 2.291288457 | 1.033405743 | 2.217220556 | 0.026608024 | NA |
| CCDC40 | 12.14201443 | -1.113432361 | 0.490615746 | -2.269459083 | 0.023240423 | 0.115865478 |
| PPP1R27 | 9.16047038 | -1.293034087 | 0.394172517 | -3.280376054 | 0.001036688 | 0.016146474 |
| DLGAP1 | 14.00941497 | 1.674962378 | 0.428173862 | 3.911874418 | 9.16E-05 | 0.003121549 |
| CTAGE1 | 2.620949227 | -1.484312181 | 0.735614617 | -2.017785056 | 0.043613652 | NA |
| ANKRD29 | 4.436771279 | -1.293602068 | 0.510143146 | -2.53576291 | 0.011220267 | 0.07302625 |
| DSG3 | 3.312833623 | 2.712157558 | 0.781266688 | 3.471487523 | 0.000517583 | 0.010101825 |
| ASXL3 | 4.836080812 | 1.330567509 | 0.5396149 | 2.465772366 | 0.013671819 | 0.082868164 |
| PMAIP1 | 866.210318 | -1.67021752 | 0.212773803 | -7.849732881 | 4.17E-15 | 2.94E-11 |
| SERPINB2 | 78.73342227 | 1.173262739 | 0.411350583 | 2.852220923 | 0.004341492 | 0.04041081 |
| SMIM24 | 8.259585946 | -1.185925853 | 0.428607948 | -2.76692455 | 0.005658785 | 0.047473909 |
| TEX45 | 5.716368144 | -1.421779882 | 0.53452481 | -2.659895023 | 0.007816501 | 0.05794249 |
| COL5A3 | 125.5862299 | 1.305521532 | 0.48674012 | 2.682173664 | 0.007314548 | 0.05540289 |
| AP1M2 | 19.49516602 | 1.156670269 | 0.470164791 | 2.460137999 | 0.01388836 | 0.083420957 |
| CYP4F12 | 8.32256172 | 1.259643068 | 0.570284044 | 2.208799425 | 0.027188595 | 0.127545966 |
| F2RL3 | 20.90169186 | 1.004635943 | 0.298819302 | 3.362018242 | 0.00077375 | 0.013347662 |
| AC007192.1 | 10.87089805 | -1.213663528 | 0.525728994 | -2.308534516 | 0.020969425 | 0.108706672 |
| JUND | 4336.044805 | -1.099947676 | 0.20052859 | -5.485241174 | 4.13E-08 | 1.04E-05 |
| ZNF208 | 109.8040064 | 1.110214444 | 0.316843669 | 3.503981781 | 0.000458357 | 0.009378374 |
| FFAR1 | 5.869345973 | -1.608170947 | 0.679849529 | -2.365480711 | 0.018006681 | 0.098117961 |
| CYP2F1 | 17.06763037 | -1.595980945 | 0.327339919 | -4.875607439 | 1.08E-06 | 0.000129928 |
| TEX101 | 3.084036841 | 1.640132259 | 0.658223182 | 2.491757059 | 0.012711295 | 0.079191647 |
| FOSB | 5609.145938 | -2.569777885 | 0.480420355 | -5.349019583 | 8.84E-08 | 1.89E-05 |
| SIX5 | 3.006549973 | 1.434615947 | 0.648704373 | 2.211509599 | 0.027000568 | 0.1271288 |
| GNG8 | 6.267720031 | 1.055880816 | 0.476742604 | 2.214781742 | 0.026775049 | 0.126658638 |
| MYADM | 2754.903055 | -1.219249925 | 0.180403606 | -6.758456493 | 1.39E-11 | 1.41E-08 |
| PRKCG | 7.323335884 | -1.272091478 | 0.627789206 | -2.02630352 | 0.042733691 | 0.169196159 |
| LILRA2 | 2.940460692 | -2.522862144 | 0.948953627 | -2.658572634 | 0.007847243 | 0.058035876 |
| TNNT1 | 13.56122188 | -1.819595417 | 0.650199299 | -2.798519501 | 0.005133747 | 0.044705792 |
| SYT5 | 7.481104435 | -2.477388835 | 0.575389682 | -4.305584395 | 1.67E-05 | 0.000900396 |
| TMEM190 | 2.006231784 | 2.111492633 | 0.89620271 | 2.356043572 | 0.018470751 | NA |
| ZNF667 | 53.33135672 | -1.284140464 | 0.347677881 | -3.693477601 | 0.000221208 | 0.005856409 |
| TMC2 | 2.756583797 | -1.631436621 | 0.788212353 | -2.069793267 | 0.038471708 | NA |
| BMP2 | 5.357585254 | -1.384150813 | 0.530961345 | -2.606876801 | 0.009137223 | 0.063514952 |
| NINL | 82.42913675 | 1.222498915 | 0.573953883 | 2.129960177 | 0.033174901 | 0.144752947 |
| ID1 | 91.5025493 | -1.049886674 | 0.417914186 | -2.512206357 | 0.011997891 | 0.076208438 |
| CCM2L | 3.944437276 | -1.456562173 | 0.672353326 | -2.166364196 | 0.030283368 | 0.135825425 |
| MYL9 | 135.0749135 | 1.478092218 | 0.466316903 | 3.16971615 | 0.001525879 | 0.020783476 |
| VSTM2L | 2.728433534 | 1.498835237 | 0.713226437 | 2.101485811 | 0.035598342 | NA |
| GDAP1L1 | 12.79720975 | 1.114006564 | 0.355243559 | 3.135895177 | 0.001713304 | 0.022241432 |
| KCNS1 | 30.09586661 | 1.375226686 | 0.392763706 | 3.501409793 | 0.000462804 | 0.009383077 |
| EYA2 | 7.413102525 | 1.206473551 | 0.570789547 | 2.113692443 | 0.034541544 | 0.147522921 |
| MRAP | 3.222001657 | 1.293664616 | 0.575322886 | 2.248588832 | 0.024538668 | 0.120123125 |
| KCNJ15 | 170.7546496 | 1.670798549 | 0.640344996 | 2.609216217 | 0.009074988 | 0.063426032 |
| TUBA8 | 16.30699975 | 1.012314203 | 0.285656241 | 3.543819663 | 0.000394375 | 0.008574768 |
| SEPTIN5 | 342.3602044 | 1.094385676 | 0.326742817 | 3.349379445 | 0.000809928 | 0.013769751 |
| RTN4R | 6.108043742 | 1.086827625 | 0.419659352 | 2.589785309 | 0.00960358 | 0.06572072 |
| IGLL5 | 28.77234685 | 1.020847721 | 0.408596292 | 2.498426295 | 0.012474608 | 0.078304802 |
| GNAZ | 549.620448 | 1.032601129 | 0.401534345 | 2.571638374 | 0.010121856 | 0.067839273 |
| APOL4 | 16.78393663 | -1.471704103 | 0.559153623 | -2.632021047 | 0.00848786 | 0.060859857 |
| PVALB | 35.60181552 | 1.247528522 | 0.489153561 | 2.550382175 | 0.010760489 | 0.070887609 |
| CDC42EP1 | 55.98964951 | -1.251288663 | 0.315760668 | -3.962775579 | 7.41E-05 | 0.002687381 |
| NDUFA6 | 15.37621826 | -2.973986993 | 0.758942748 | -3.918592018 | 8.91E-05 | 0.00306545 |
| RABL2B | 22.58602314 | -1.378133541 | 0.694935824 | -1.983109077 | 0.047355247 | 0.179631691 |
| CD99 | 6.760842477 | 1.69966183 | 0.816541796 | 2.081536839 | 0.037384796 | 0.155203546 |
| FAM9B | 3.658721191 | -1.434905719 | 0.621284982 | -2.309577344 | 0.020911565 | 0.108563643 |
| BEND2 | 457.1697492 | 1.061200988 | 0.399891784 | 2.653720411 | 0.007960976 | 0.058479324 |
| PPEF1 | 5.53176568 | -1.447666991 | 0.44544658 | -3.249922786 | 0.001154363 | 0.017421629 |
| CXorf58 | 11.99603801 | 1.117336342 | 0.511554637 | 2.184197466 | 0.028947741 | 0.132237479 |
| PCYT1B | 173.9211551 | 1.075694302 | 0.290058933 | 3.708537052 | 0.00020846 | 0.005629798 |
| MAOB | 17.47400145 | 2.04317749 | 0.631678853 | 3.234519376 | 0.001218477 | 0.01793759 |
| ATP7A | 4.87125004 | 2.44152314 | 0.807036787 | 3.025293493 | 0.00248392 | 0.02813049 |
| SYTL4 | 132.9118791 | 1.138641547 | 0.34255907 | 3.323927603 | 0.000887592 | 0.014563739 |
| HNRNPH2 | 16.73968004 | -1.655694046 | 0.539202057 | -3.070637478 | 0.002136023 | 0.025419256 |
| ARMCX3 | 10.77685658 | -1.193183719 | 0.548302225 | -2.176142398 | 0.029544614 | 0.133966599 |
| ZNF185 | 161.1678579 | 1.678429695 | 0.464669933 | 3.612090163 | 0.000303739 | 0.007264508 |
| PLXNB3 | 4.194447056 | 3.641464438 | 1.102900988 | 3.30171473 | 0.000960957 | 0.015304821 |
| TKTL1 | 5.991564942 | -1.387771902 | 0.641832935 | -2.162201139 | 0.030602676 | 0.13691641 |

**Table S5**

The relationship pairs in the ceRNA network

| **source** | **target** | **logfc1** | **logfc2** | **Filt** | **Type** |
| --- | --- | --- | --- | --- | --- |
| hsa-miR-6837-3p | hsa_circ_0011950 | 2.3568748 | -1.992777 | YES | circRNA |
| hsa-miR-6837-3p | hsa_circ_0084582 | 2.3568748 | -1.65118 | YES | circRNA |
| hsa-miR-618 | hsa_circ_0057684 | -1.46209 | 1.1664908 | YES | circRNA |
| hsa-miR-486-5p | hsa_circ_0032449 | 1.0969579 | -1.490037 | YES | circRNA |
| hsa-miR-3690 | hsa_circ_0008707 | -2.988923 | 2.295211 | YES | circRNA |
| hsa-miR-4772-5p | hsa_circ_0060740 | -1.085314 | 1.2909709 | YES | circRNA |
| hsa-miR-3920 | hsa_circ_0032449 | 1.8168597 | -1.490037 | YES | circRNA |
| hsa-miR-4772-5p | hsa_circ_0006845 | -1.085314 | 1.3503049 | YES | circRNA |
| hsa-miR-3157-5p | hsa_circ_0057252 | -1.992686 | 1.5723876 | YES | circRNA |
| hsa-miR-6837-3p | hsa_circ_0008083 | 2.3568748 | -1.156004 | YES | circRNA |
| hsa-miR-1284 | hsa_circ_0004511 | -2.099077 | 1.9954497 | YES | circRNA |
| hsa-miR-371b-5p | hsa_circ_0054876 | -1.876545 | 1.3828273 | YES | circRNA |
| hsa-miR-371b-5p | hsa_circ_0075568 | -1.876545 | 1.3895801 | YES | circRNA |
| hsa-miR-4422 | hsa_circ_0027496 | -2.543258 | 2.4903024 | YES | circRNA |
| hsa-miR-23a-5p | hsa_circ_0004100 | -1.329543 | 1.4875334 | YES | circRNA |
| hsa-miR-486-5p | hsa_circ_0054597 | 1.0969579 | -1.101198 | YES | circRNA |
| hsa-miR-3115 | hsa_circ_0002092 | 1.0913176 | -1.556291 | YES | circRNA |
| hsa-miR-3157-5p | hsa_circ_0056560 | -1.992686 | 1.6517525 | YES | circRNA |
| hsa-miR-3690 | hsa_circ_0054876 | -2.988923 | 1.3828273 | YES | circRNA |
| hsa-miR-3934-5p | hsa_circ_0000831 | -1.824189 | 1.4353447 | YES | circRNA |
| hsa-miR-3934-5p | hsa_circ_0015779 | -1.824189 | 2.2575036 | YES | circRNA |
| hsa-miR-1-3p | hsa_circ_0055049 | 2.2310934 | -1.658836 | YES | circRNA |
| hsa-miR-1-3p | hsa_circ_0055066 | 2.2310934 | -2.01094 | YES | circRNA |
| hsa-miR-30c-2-3p | hsa_circ_0062426 | 1.3873921 | -1.288044 | YES | circRNA |
| hsa-miR-3120-3p | hsa_circ_0007161 | 1.0043891 | -1.135366 | YES | circRNA |
| hsa-miR-3690 | hsa_circ_0007631 | -2.988923 | 1.8117086 | YES | circRNA |
| hsa-miR-4422 | hsa_circ_0047430 | -2.543258 | 1.3237556 | YES | circRNA |
| hsa-miR-6837-3p | hsa_circ_0001958 | 2.3568748 | -1.484979 | YES | circRNA |
| hsa-miR-6837-3p | hsa_circ_0007813 | 2.3568748 | -1.443945 | YES | circRNA |
| hsa-miR-6837-3p | hsa_circ_0044965 | 2.3568748 | -1.150722 | YES | circRNA |
| hsa-miR-1-3p | hsa_circ_0015164 | 2.2310934 | -1.318143 | YES | circRNA |
| hsa-miR-30c-2-3p | hsa_circ_0031569 | 1.3873921 | -1.308175 | YES | circRNA |
| hsa-miR-3120-3p | hsa_circ_0000996 | 1.0043891 | -3.321822 | YES | circRNA |
| hsa-miR-3120-3p | hsa_circ_0069606 | 1.0043891 | -1.465037 | YES | circRNA |
| hsa-miR-371b-5p | hsa_circ_0058480 | -1.876545 | 1.3825591 | YES | circRNA |
| hsa-miR-605-3p | hsa_circ_0005759 | 1.1873759 | -1.171751 | YES | circRNA |
| hsa-miR-605-3p | hsa_circ_0072081 | 1.1873759 | -1.738021 | YES | circRNA |
| hsa-miR-3690 | hsa_circ_0046029 | -2.988923 | 1.7455733 | YES | circRNA |
| hsa-miR-371b-5p | hsa_circ_0050807 | -1.876545 | 1.4635935 | YES | circRNA |
| hsa-miR-486-5p | hsa_circ_0003677 | 1.0969579 | -1.593477 | YES | circRNA |
| hsa-miR-1229-3p | hsa_circ_0000996 | 2.3252022 | -3.321822 | YES | circRNA |
| hsa-miR-1284 | hsa_circ_0057684 | -2.099077 | 1.1664908 | YES | circRNA |
| hsa-miR-30c-2-3p | hsa_circ_0000126 | 1.3873921 | -1.723619 | YES | circRNA |
| hsa-miR-30c-2-3p | hsa_circ_0007161 | 1.3873921 | -1.135366 | YES | circRNA |
| hsa-miR-3120-3p | hsa_circ_0027707 | 1.0043891 | -1.66686 | YES | circRNA |
| hsa-miR-3157-5p | hsa_circ_0007631 | -1.992686 | 1.8117086 | YES | circRNA |
| hsa-miR-371b-5p | hsa_circ_0000069 | -1.876545 | 1.0685026 | YES | circRNA |
| hsa-miR-3934-5p | hsa_circ_0046029 | -1.824189 | 1.7455733 | YES | circRNA |
| hsa-miR-486-5p | hsa_circ_0004257 | 1.0969579 | -1.488722 | YES | circRNA |
| hsa-miR-6837-3p | hsa_circ_0054597 | 2.3568748 | -1.101198 | YES | circRNA |
| hsa-miR-6837-3p | hsa_circ_0071234 | 2.3568748 | -1.246725 | YES | circRNA |
| hsa-miR-219b-5p | hsa_circ_0006558 | -1.856625 | 1.7487877 | YES | circRNA |
| hsa-miR-30c-2-3p | hsa_circ_0007539 | 1.3873921 | -2.013951 | YES | circRNA |
| hsa-miR-30c-2-3p | hsa_circ_0043428 | 1.3873921 | -1.128486 | YES | circRNA |
| hsa-miR-3120-3p | hsa_circ_0003677 | 1.0043891 | -1.593477 | YES | circRNA |
| hsa-miR-3120-3p | hsa_circ_0028190 | 1.0043891 | -1.331337 | YES | circRNA |
| hsa-miR-3120-3p | hsa_circ_0052575 | 1.0043891 | -1.335658 | YES | circRNA |
| hsa-miR-3690 | hsa_circ_0069920 | -2.988923 | 1.1598836 | YES | circRNA |
| hsa-miR-371b-5p | hsa_circ_0004736 | -1.876545 | 1.1157098 | YES | circRNA |
| hsa-miR-3920 | hsa_circ_0037682 | 1.8168597 | -1.647115 | YES | circRNA |
| hsa-miR-4422 | hsa_circ_0007930 | -2.543258 | 2.6003664 | YES | circRNA |
| hsa-miR-605-3p | hsa_circ_0011950 | 1.1873759 | -1.992777 | YES | circRNA |
| hsa-miR-618 | hsa_circ_0056560 | -1.46209 | 1.6517525 | YES | circRNA |
| hsa-miR-219b-5p | hsa_circ_0003396 | -1.856625 | 1.2982707 | YES | circRNA |
| hsa-miR-219b-5p | hsa_circ_0029772 | -1.856625 | 2.1545499 | YES | circRNA |
| hsa-miR-3120-3p | hsa_circ_0001513 | 1.0043891 | -2.129644 | YES | circRNA |
| hsa-miR-3690 | hsa_circ_0006266 | -2.988923 | 2.2353135 | YES | circRNA |
| hsa-miR-3934-5p | hsa_circ_0004100 | -1.824189 | 1.4875334 | YES | circRNA |
| hsa-miR-4772-5p | hsa_circ_0056560 | -1.085314 | 1.6517525 | YES | circRNA |
| hsa-miR-486-5p | hsa_circ_0007813 | 1.0969579 | -1.443945 | YES | circRNA |
| hsa-miR-605-3p | hsa_circ_0073752 | 1.1873759 | -1.922049 | YES | circRNA |
| hsa-miR-6837-3p | hsa_circ_0027707 | 2.3568748 | -1.66686 | YES | circRNA |
| hsa-miR-1-3p | ANKRD29 | 2.2310934 | -1.293602 | YES | mRNA |
| hsa-miR-1284 | KCNQ3 | -2.099077 | 1.298578 | YES | mRNA |
| hsa-miR-1284 | CDH6 | -2.099077 | 1.7266702 | YES | mRNA |
| hsa-miR-219b-5p | NFIB | -1.856625 | 1.3312831 | YES | mRNA |
| hsa-miR-23a-5p | ALPL | -1.329543 | 1.7144506 | YES | mRNA |
| hsa-miR-27a-5p | NFIB | -1.828406 | 1.3312831 | YES | mRNA |
| hsa-miR-27a-5p | CCR5 | -1.828406 | 1.0627354 | YES | mRNA |
| hsa-miR-30c-2-3p | FOSB | 1.3873921 | -2.569778 | YES | mRNA |
| hsa-miR-3157-5p | MEIS2 | -1.992686 | 1.4747775 | YES | mRNA |
| hsa-miR-3157-5p | KCNJ15 | -1.992686 | 1.6707985 | YES | mRNA |
| hsa-miR-3157-5p | RASL11B | -1.992686 | 1.0963855 | YES | mRNA |
| hsa-miR-3157-5p | ARCN1 | -1.992686 | 1.3899461 | YES | mRNA |
| hsa-miR-371b-5p | NKAIN2 | -1.876545 | 1.583758 | YES | mRNA |
| hsa-miR-371b-5p | MAPK10 | -1.876545 | 1.1198182 | YES | mRNA |
| hsa-miR-371b-5p | MYO3B | -1.876545 | 1.3119432 | YES | mRNA |
| hsa-miR-3934-5p | CDH6 | -1.824189 | 1.7266702 | YES | mRNA |
| hsa-miR-4422 | ASXL3 | -2.543258 | 1.3305675 | YES | mRNA |
| hsa-miR-4422 | NFIB | -2.543258 | 1.3312831 | YES | mRNA |
| hsa-miR-4772-5p | TRPA1 | -1.085314 | 1.2404316 | YES | mRNA |
| hsa-miR-486-5p | EMP1 | 1.0969579 | -1.53555 | YES | mRNA |
| hsa-miR-618 | SH3BGRL2 | -1.46209 | 1.3131638 | YES | mRNA |
| hsa-miR-618 | TGFB2 | -1.46209 | 1.5674925 | YES | mRNA |
| hsa-miR-1-3p | SLC28A3 | 2.2310934 | -1.035808 | YES | mRNA |
| hsa-miR-27a-5p | LTBP1 | -1.828406 | 1.1460772 | YES | mRNA |
| hsa-miR-30c-2-3p | RABL2B | 1.3873921 | -1.378134 | YES | mRNA |
| hsa-miR-30c-2-3p | TENM4 | 1.3873921 | -2.327919 | YES | mRNA |
| hsa-miR-3120-3p | DCAF1 | 1.0043891 | -2.378394 | YES | mRNA |
| hsa-miR-3120-3p | CFAP43 | 1.0043891 | -1.147014 | YES | mRNA |
| hsa-miR-3157-5p | TREML1 | -1.992686 | 1.147413 | YES | mRNA |
| hsa-miR-3157-5p | SLC47A2 | -1.992686 | 1.0708711 | YES | mRNA |
| hsa-miR-3157-5p | SH3TC2 | -1.992686 | 1.1127971 | YES | mRNA |
| hsa-miR-3157-5p | KCNQ3 | -1.992686 | 1.298578 | YES | mRNA |
| hsa-miR-371b-5p | SH3TC2 | -1.876545 | 1.1127971 | YES | mRNA |
| hsa-miR-3934-5p | TRPA1 | -1.824189 | 1.2404316 | YES | mRNA |
| hsa-miR-4422 | COL6A3 | -2.543258 | 1.0641877 | YES | mRNA |
| hsa-miR-4802-3p | GUCY1B1 | -1.593519 | 1.0802726 | YES | mRNA |
| hsa-miR-6837-3p | SMIM24 | 2.3568748 | -1.185926 | YES | mRNA |
| hsa-miR-1229-3p | RHBDL3 | 2.3252022 | -1.853513 | YES | mRNA |
| hsa-miR-618 | PRKG1 | -1.46209 | 1.5492433 | YES | mRNA |
| hsa-miR-3920 | MIR222HG | 1.8168597 | -2.255167 | YES | lncRNA |
| hsa-miR-3157-5p | AC064874.1 | -1.992686 | 1.0488208 | YES | lncRNA |
| hsa-miR-6837-3p | LINC00504 | 2.3568748 | -1.05574 | YES | lncRNA |
| hsa-miR-3120-3p | LINC00504 | 1.0043891 | -1.05574 | YES | lncRNA |
| hsa-miR-6837-3p | LINC00607 | 2.3568748 | -2.023798 | YES | lncRNA |
| hsa-miR-4802-3p | LINC00943 | -1.593519 | 1.0690638 | YES | lncRNA |
| hsa-miR-3120-3p | USP2-AS1 | 1.0043891 | -1.548296 | YES | lncRNA |
| hsa-miR-4422 | LINC01355 | -2.543258 | 1.8845995 | YES | lncRNA |
| hsa-miR-4422 | AC010983.1 | -2.543258 | 1.0512531 | YES | lncRNA |
| hsa-miR-30c-2-3p | HIPK1-AS1 | 1.3873921 | -1.687761 | YES | lncRNA |
| hsa-miR-3690 | LINC01355 | -2.988923 | 1.8845995 | YES | lncRNA |
| hsa-miR-3120-3p | LINC00535 | 1.0043891 | -2.324017 | YES | lncRNA |
| hsa-miR-605-3p | USP2-AS1 | 1.1873759 | -1.548296 | YES | lncRNA |
| hsa-miR-605-3p | AP000640.2 | 1.1873759 | -1.348764 | YES | lncRNA |
| hsa-miR-4802-3p | DLGAP1-AS5 | -1.593519 | 1.6102926 | YES | lncRNA |
| hsa-miR-4772-5p | DKFZP434H168 | -1.085314 | 2.5454204 | YES | lncRNA |
| hsa-miR-30c-2-3p | LINC00051 | 1.3873921 | -1.547639 | YES | lncRNA |
| hsa-miR-3157-5p | LINC00664 | -1.992686 | 1.5876999 | YES | lncRNA |
| hsa-miR-3920 | HSD52 | 1.8168597 | -1.914216 | YES | lncRNA |
| hsa-miR-23a-5p | LINC00664 | -1.329543 | 1.5876999 | YES | lncRNA |
| hsa-miR-4772-5p | BACE2-IT1 | -1.085314 | 1.2961592 | YES | lncRNA |
| hsa-miR-3120-3p | LINC00271 | 1.0043891 | -1.066776 | YES | lncRNA |
| hsa-miR-605-3p | PRMT5-AS1 | 1.1873759 | -1.279342 | YES | lncRNA |
| hsa-miR-1284 | LINC00664 | -2.099077 | 1.5876999 | YES | lncRNA |
| hsa-miR-1229-3p | USP2-AS1 | 2.3252022 | -1.548296 | YES | lncRNA |
| hsa-miR-27a-5p | IL21-AS1 | -1.828406 | 1.5471132 | YES | lncRNA |
| hsa-miR-1284 | LINC00943 | -2.099077 | 1.0690638 | YES | lncRNA |
| hsa-miR-30c-2-3p | LINC00271 | 1.3873921 | -1.066776 | YES | lncRNA |
| hsa-miR-4422 | AC019117.1 | -2.543258 | 1.3309721 | YES | lncRNA |
| hsa-miR-618 | IL21-AS1 | -1.46209 | 1.5471132 | YES | lncRNA |
| hsa-miR-486-5p | LINC01132 | 1.0969579 | -1.271883 | YES | lncRNA |
| hsa-miR-4802-3p | LINC00664 | -1.593519 | 1.5876999 | YES | lncRNA |
| hsa-miR-219b-5p | LINC00283 | -1.856625 | 2.9453927 | YES | lncRNA |
| hsa-miR-605-3p | LINC00271 | 1.1873759 | -1.066776 | YES | lncRNA |
| hsa-miR-486-5p | HSD52 | 1.0969579 | -1.914216 | YES | lncRNA |
| hsa-miR-3120-3p | AP000708.1 | 1.0043891 | -1.184054 | YES | lncRNA |
| hsa-miR-3690 | LINC00596 | -2.988923 | 2.0072093 | YES | lncRNA |
| hsa-miR-219b-5p | LINC01355 | -1.856625 | 1.8845995 | YES | lncRNA |
| hsa-miR-371b-5p | LINC01355 | -1.876545 | 1.8845995 | YES | lncRNA |
| hsa-miR-4422 | DLGAP1-AS5 | -2.543258 | 1.6102926 | YES | lncRNA |
| hsa-miR-3690 | PCOLCE-AS1 | -2.988923 | 1.0469675 | YES | lncRNA |
| hsa-miR-618 | LINC00664 | -1.46209 | 1.5876999 | YES | lncRNA |
| hsa-miR-3920 | LINC01132 | 1.8168597 | -1.271883 | YES | lncRNA |
| hsa-miR-486-5p | CATIP-AS2 | 1.0969579 | -1.272515 | YES | lncRNA |
| hsa-miR-3690 | LINC00664 | -2.988923 | 1.5876999 | YES | lncRNA |
| hsa-miR-371b-5p | LINC00283 | -1.876545 | 2.9453927 | YES | lncRNA |
| hsa-miR-3120-3p | DNAJC27-AS1 | 1.0043891 | -1.042332 | YES | lncRNA |
| hsa-miR-3690 | DLGAP1-AS5 | -2.988923 | 1.6102926 | YES | lncRNA |
| hsa-miR-23a-5p | LINC01355 | -1.329543 | 1.8845995 | YES | lncRNA |

**Table S6**

The GO and pathway enrichment result of mRNAs in the ceRNA network

| **GO** | | | | | | | | | | | | | | |
| --- | --- | --- | --- | --- | --- | --- | --- | --- | --- | --- | --- | --- | --- | --- |
| **Category** | | **Term** | | **Description** | **LogP** | | | **Log**  **(q-value)** | | **InTerm_InList** | | **Symbols** | **GeneRatio** | |
| GO Biological Processes | | GO:0060038 | | cardiac muscle cell proliferation | -3.651788 | | | 0 | | 3/60 | | TGFB2,  ZFPM2,  TENM4 | 0.05 | |
| GO Biological Processes | | GO:0014855 | | striated muscle cell proliferation | -3.348704 | | | 0 | | 3/76 | | TGFB2,  ZFPM2,  TENM4 | 0.0394737 | |
| GO Biological Processes | | GO:0055017 | | cardiac muscle tissue growth | -3.052661 | | | 0 | | 3/96 | | TGFB2,  ZFPM2,  TENM4 | 0.03125 | |
| GO Biological Processes | | GO:0098662 | | inorganic cation transmembrane transport | -3.04802 | | | 0 | | 7/799 | | CCR5,  KCNJ15,KCNQ3,  TRPC6,  TRPA1,  SLC28A3,SLC47A2 | 0.008761 | |
| GO Biological Processes | | GO:0060419 | | heart growth | -2.952098 | | | 0 | | 3/104 | | TGFB2,  ZFPM2,  TENM4 | 0.0288462 | |
| GO Biological Processes | | GO:0033002 | | muscle cell proliferation | -2.851413 | | | 0 | | 4/248 | | PRKG1,  TGFB2,  ZFPM2,  TENM4 | 0.016129 | |
| GO Biological Processes | | GO:0098742 | | cell-cell adhesion via plasma-membrane adhesion molecules | -2.687702 | | | 0 | | 4/275 | | CDH6,  TGFB2,  TENM4,  CNTN4 | 0.0145455 | |
| GO Biological Processes | | GO:0019932 | | second-messenger-mediated signaling | -2.490349 | | | 0 | | 4/312 | | CCR5,GUCY1B1,PRKG1,RCAN2 | 0.0128205 | |
| GO Biological Processes | | GO:0035265 | | organ growth | -2.290798 | | | 0 | | 3/178 | | TGFB2,ZFPM2,TENM4 | 0.0168539 | |
| GO Biological Processes | | GO:0003013 | | circulatory system process | -2.210012 | | | 0 | | 5/598 | | GUCY1B1,P2RY2,PRKG1,SLC22A3,TGFB2 | 0.0083612 | |
| GO Biological Processes | | GO:0042063 | | gliogenesis | -3.518253 | | | 0 | | 5/301 | | GBA,NFIB,TGFB2,TENM4,SH3TC2 | 0.0166113 | |
| GO Biological Processes | | GO:0007420 | | brain development | -3.199059 | | | 0 | | 7/753 | | ARCN1,GBA,MEIS2,NFIB,PRKG1,CFAP43,CNTN4 | 0.0092961 | |
| GO Biological Processes | | GO:0060322 | | head development | -3.057547 | | | 0 | | 7/796 | | ARCN1,GBA,MEIS2,NFIB,PRKG1,CFAP43,CNTN4 | 0.008794 | |
| GO Biological Processes | | GO:0050878 | | regulation of body fluid levels | -3.049517 | | | 0 | | 5/382 | | GBA,HAS2,P2RY2,PRKG1,TREML1 | 0.013089 | |
| GO Biological Processes | | GO:0010001 | | glial cell differentiation | -3.007204 | | | 0 | | 4/225 | | GBA,NFIB,TENM4,SH3TC2 | 0.0177778 | |
| GO Biological Processes | | GO:0051384 | | response to glucocorticoid | -2.514907 | | | 0 | | 3/148 | | ALPL,FOSB,GBA | 0.0202703 | |
| GO Biological Processes | | GO:0030902 | | hindbrain development | -2.482311 | | | 0 | | 3/152 | | ARCN1,GBA,NFIB | 0.0197368 | |
| GO Biological Processes | | GO:0051235 | | maintenance of location | -2.427194 | | | 0 | | 4/325 | | CCR5,GBA,LTBP1,TRPA1 | 0.0123077 | |
| GO Biological Processes | | GO:0031960 | | response to corticosteroid | -2.367849 | | | 0 | | 3/167 | | ALPL,FOSB,GBA | 0.0179641 | |
| GO Biological Processes | | GO:0048545 | | response to steroid hormone | -2.36231 | | | 0 | | 4/339 | | ALPL,FOSB,GBA,TGFB2 | 0.0117994 | |
| GO Biological Processes | | GO:0010035 | | response to inorganic substance | -2.283983 | | | 0 | | 5/574 | | FOSB,GUCY1B1,MAPK10,TRPC6,TRPA1 | 0.0087108 | |
| GO Biological Processes | | GO:0050900 | | leukocyte migration | -2.220773 | | | 0 | | 4/372 | | CCR5,GBA,CXCL5,TGFB2 | 0.0107527 | |
| GO Biological Processes | | GO:0099111 | | microtubule-based transport | -2.206184 | | | 0 | | 3/191 | | RABL2B,ARMCX3,CFAP43 | 0.0157068 | |
| GO Biological Processes | | GO:1901654 | | response to ketone | -2.199939 | | | 0 | | 3/192 | | FOSB,GBA,TGFB2 | 0.015625 | |
| GO Biological Processes | | GO:0006935 | | chemotaxis | -2.183194 | | | 0 | | 5/607 | | CCR5,NFIB,CXCL5,TGFB2,CNTN4 | 0.0082372 | |
| GO Biological Processes | | GO:0042330 | | taxis | -2.174362 | | | 0 | | 5/610 | | CCR5,NFIB,CXCL5,TGFB2,CNTN4 | 0.0081967 | |
| GO Biological Processes | | GO:0007179 | | transforming growth factor beta receptor signaling pathway | -2.13939 | | | 0 | | 3/202 | | LTBP1,TGFB2,RASL11B | 0.0148515 | |
| GO Biological Processes | | GO:0009612 | | response to mechanical stimulus | -2.059971 | | | 0 | | 3/216 | | FOSB,MEIS2,TRPA1 | 0.0138889 | |
| GO Biological Processes | | GO:0016311 | | dephosphorylation | -2.038942 | | | 0 | | 4/420 | | ALPL,GBA,TGFB2,CTDSPL | 0.0095238 | |
| GO Biological Processes | | GO:0006873 | | cellular ion homeostasis | -2.016016 | | | 0 | | 5/667 | | CCR5,P2RY2,TRPC6,TRPA1,LETM2 | 0.0074963 | |
| GO Molecular Functions | | GO:0022890 | | inorganic cation transmembrane transporter activity | -3.793151 | | | 0 | | 7/600 | | KCNJ15,KCNQ3,SLC22A3,TRPC6,TRPA1,SLC28A3,SLC47A2 | 0.0116667 | |
| GO Molecular Functions | | GO:0046873 | | metal ion transmembrane transporter activity | -3.719085 | | | 0 | | 6/431 | | KCNJ15,KCNQ3,SLC22A3,TRPC6,TRPA1,SLC28A3 | 0.0139211 | |
| GO Molecular Functions | | GO:0008324 | | cation transmembrane transporter activity | -3.577115 | | | 0 | | 7/651 | | KCNJ15,KCNQ3,SLC22A3,TRPC6,TRPA1,SLC28A3,SLC47A2 | 0.0107527 | |
| GO Molecular Functions | | GO:0015318 | | inorganic molecular entity transmembrane transporter activity | -3.247236 | | | 0 | | 7/739 | | KCNJ15,KCNQ3,SLC22A3,TRPC6,TRPA1,SLC28A3,SLC47A2 | 0.0094723 | |
| GO Molecular Functions | | GO:0005261 | | cation channel activity | -2.375953 | | | 0 | | 4/336 | | KCNJ15,KCNQ3,TRPC6,TRPA1 | 0.0119048 | |
| GO Molecular Functions | | GO:0019001 | | guanyl nucleotide binding | -2.965351 | | | 0 | | 5/399 | | GNAZ,GUCY1B1,PRKG1,RABL2B,RASL11B | 0.0125313 | |
| GO Molecular Functions | | GO:0032561 | | guanyl ribonucleotide binding | -2.965351 | | | 0 | | 5/399 | | GNAZ,GUCY1B1,PRKG1,RABL2B,RASL11B | 0.0125313 | |
| GO Molecular Functions | | GO:0005525 | | GTP binding | -2.196594 | | | 0 | | 4/378 | | GNAZ,GUCY1B1,RABL2B,RASL11B | 0.010582 | |
| GO Molecular Functions | | GO:0004674 | | protein serine/threonine kinase activity | -2.804248 | | | 0 | | 5/434 | | LTBP1,PRKG1,MAPK10,DCAF1,MYO3B | 0.0115207 | |
| GO Molecular Functions | | GO:0004672 | | protein kinase activity | -2.271398 | | | 0 | | 5/578 | | LTBP1,PRKG1,MAPK10,DCAF1,MYO3B | 0.0086505 | |
| **KEGG & Reactome Pathway** | | | | | | | | | | | | | | |
| **Category** | **Term** | | **Description** | | | **LogP** | **Log(q-value)** | | **InTerm_InList** | | **Symbols** | | | **Count** |
| KEGG Pathway | hsa04022 | | cGMP-PKG signaling pathway | | | -2.325158 | 0 | | 3/173 | | GUCY1B1,PRKG1,TRPC6 | | | 3 |
| KEGG Pathway | hsa04657 | | IL-17 signaling pathway | | | -3.065851 | 0 | | 3/95 | | FOSB,MAPK10,CXCL5 | | | 3 |
| KEGG Pathway | hsa04750 | | inflammatory mediator regulation of trp channels | | | -2.952098 | 0 | | 3/104 | | P2RY2,MAPK10,TRPA1 | | | 3 |
| KEGG Pathway | hsa04730 | | Long-term depression | | | -3.651788 | 0 | | 3/60 | | GNAZ,GUCY1B1,PRKG1 | | | 3 |
| KEGG Pathway | hsa04380 | | Osteoclast differentiation | | | -2.600737 | 0 | | 3/138 | | FOSB,MAPK10,TGFB2 | | | 3 |
| KEGG Pathway | hsa05145 | | Toxoplasmosis | | | -2.815681 | 0 | | 3/116 | | CCR5,MAPK10,TGFB2 | | | 3 |
| Reactome Gene Sets | R-HSA-388396 | | GPCR downstream signalling | | | -2.857397 | 0 | | 6/629 | | CCR5,GNAZ,P2RY2,CXCL5,TRPC6,ARHGEF26 | | | 6 |
| Reactome Gene Sets | R-HSA-109582 | | Hemostasis | | | -2.142425 | 0 | | 5/621 | | GUCY1B1,PRKG1,TGFB2,TRPC6,ZFPM2 | | | 5 |
| Reactome Gene Sets | R-HSA-418346 | | Platelet homeostasis | | | -3.162496 | 0 | | 3/88 | | GUCY1B1,PRKG1,TRPC6 | | | 3 |
| Reactome Gene Sets | R-HSA-372790 | | Signaling by GPCR | | | -2.611242 | 0 | | 6/704 | | CCR5,GNAZ,P2RY2,CXCL5,TRPC6,ARHGEF26 | | | 6 |

**Table S7**

The functional enrichment result of IPA analysis

| **Ingenuity Canonical Pathways** | **-log(p-value)** | **Ratio** | **z-score** | | **Molecules** |
| --- | --- | --- | --- | --- | --- |
| Adrenomedullin signaling pathway | 3.78E+00 | 2.01E-02 | 2 | | GUCY1B1,KCNQ3,MAPK10,PRKG1 |
| Inhibition of Angiogenesis by TSP1 | 2.99E+00 | 5.88E-02 | NaN | | GUCY1B1,MAPK10 |
| Cellular Effects of Sildenafil (Viagra) | 2.93E+00 | 2.01E-02 | NaN | | GUCY1B1,KCNQ3,PRKG1 |
| Dopamine-DARPP32 Feedback in cAMP Signaling | 2.69E+00 | 1.66E-02 | NaN | | GUCY1B1,KCNJ15,PRKG1 |
| Hepatic Fibrosis / Hepatic Stellate Cell Activation | 2.60E+00 | 1.55E-02 | NaN | | CCR5,COL6A3,TGFB2 |
| Sertoli Cell-Sertoli Cell Junction Signaling | 2.53E+00 | 1.46E-02 | NaN | | GUCY1B1,MAPK10,PRKG1 |
| CDK5 Signaling | 1.97E+00 | 1.79E-02 | NaN | | FOSB,MAPK10 |
| Nitric Oxide Signaling in the Cardiovascular System | 1.92E+00 | 1.68E-02 | NaN | | GUCY1B1,PRKG1 |
| Pathogenesis of Multiple Sclerosis | 1.90E+00 | 1.11E-01 | NaN | | CCR5 |
| Pancreatic Adenocarcinoma Signaling | 1.87E+00 | 1.59E-02 | NaN | | MAPK10,TGFB2 |
| Gα12/13 Signaling | 1.83E+00 | 1.50E-02 | NaN | | CDH6,MAPK10 |
| STAT3 Pathway | 1.82E+00 | 1.48E-02 | NaN | | MAPK10,TGFB2 |
| IL-12 Signaling and Production in Macrophages | 1.81E+00 | 1.47E-02 | NaN | | MAPK10,TGFB2 |
| White Adipose Tissue Browning Pathway | 1.81E+00 | 1.47E-02 | NaN | | GUCY1B1,PRKG1 |
| Factors Promoting Cardiogenesis in Vertebrates | 1.72E+00 | 1.32E-02 | NaN | | MAPK10,TGFB2 |
| Semaphorin Neuronal Repulsive Signaling Pathway | 1.72E+00 | 1.32E-02 | NaN | | GUCY1B1,PRKG1 |
| Role of Pattern Recognition Receptors in Recognition of Bacteria and Viruses | 1.70E+00 | 1.28E-02 | NaN | | MAPK10,TGFB2 |
| Aryl Hydrocarbon Receptor Signaling | 1.68E+00 | 1.26E-02 | NaN | | NFIB,TGFB2 |
| eNOS Signaling | 1.68E+00 | 1.26E-02 | NaN | | GUCY1B1,PRKG1 |
| HMGB1 Signaling | 1.64E+00 | 1.20E-02 | NaN | | MAPK10,TGFB2 |
| Germ Cell-Sertoli Cell Junction Signaling | 1.62E+00 | 1.17E-02 | NaN | | MAPK10,TGFB2 |
| IL-17 Signaling | 1.55E+00 | 1.07E-02 | NaN | | MAPK10,TGFB2 |
| Hepatic Cholestasis | 1.54E+00 | 1.06E-02 | NaN | | MAPK10,TGFB2 |
| Endothelin-1 Signaling | 1.53E+00 | 1.05E-02 | NaN | | GUCY1B1,MAPK10 |
| Regulation Of The Epithelial Mesenchymal Transition By Growth Factors Pathway | 1.53E+00 | 1.04E-02 | NaN | | MAPK10,TGFB2 |
| Synaptic Long Term Depression | 1.52E+00 | 1.03E-02 | NaN | | GUCY1B1,PRKG1 |
| RAR Activation | 1.51E+00 | 1.02E-02 | NaN | | MAPK10,TGFB2 |
| Gap Junction Signaling | 1.51E+00 | 1.01E-02 | NaN | | GUCY1B1,PRKG1 |
| Apelin Cardiac Fibroblast Signaling Pathway | 1.50E+00 | 4.35E-02 | NaN | | TGFB2 |
| IL-22 Signaling | 1.48E+00 | 4.17E-02 | NaN | | MAPK10 |
| Role of JAK family kinases in IL-6-type Cytokine Signaling | 1.46E+00 | 4.00E-02 | NaN | | MAPK10 |
| Autophagy | 1.45E+00 | 9.39E-03 | NaN | | MAPK10,TGFB2 |
| IL-17A Signaling in Gastric Cells | 1.45E+00 | 3.85E-02 | NaN | | MAPK10 |
| Apelin Liver Signaling Pathway | 1.45E+00 | 3.85E-02 | NaN | | MAPK10 |
| Role of NFAT in Cardiac Hypertrophy | 1.42E+00 | 9.09E-03 | NaN | | MAPK10,TGFB2 |
| Cardiac Hypertrophy Signaling (Enhanced) | 1.41E+00 | 5.58E-03 | NaN | | MAPK10,PRKG1,TGFB2 |
| Role of Osteoblasts, Osteoclasts and Chondrocytes in Rheumatoid Arthritis | 1.41E+00 | 8.93E-03 | NaN | | ALPL,MAPK10 |
| Airway Inflammation in Asthma | 1.34E+00 | 3.03E-02 | NaN | | TGFB2 |
| 4-1BB Signaling in T Lymphocytes | 1.33E+00 | 2.94E-02 | NaN | | MAPK10 |
| Sperm Motility | 1.31E+00 | 7.87E-03 | NaN | | GUCY1B1,PRKG1 |
| Cardiac Hypertrophy Signaling | 1.30E+00 | 7.75E-03 | NaN | | MAPK10,TGFB2 |
| Signaling by Rho Family GTPases | 1.27E+00 | 7.46E-03 | NaN | | CDH6,MAPK10 |
| Colorectal Cancer Metastasis Signaling | 1.27E+00 | 7.43E-03 | NaN | | MAPK10,TGFB2 |
| April Mediated Signaling | 1.24E+00 | 2.38E-02 | NaN | | MAPK10 |
| B Cell Activating Factor Signaling | 1.23E+00 | 2.33E-02 | NaN | | MAPK10 |
| MIF Regulation of Innate Immunity | 1.22E+00 | 2.27E-02 | NaN | | MAPK10 |
| Coronavirus Replication Pathway | 1.21E+00 | 2.22E-02 | NaN | | ARCN1 |
| Apelin Pancreas Signaling Pathway | 1.20E+00 | 2.17E-02 | NaN | | MAPK10 |
| PFKFB4 Signaling Pathway | 1.20E+00 | 2.17E-02 | NaN | | TGFB2 |
| Senescence Pathway | 1.19E+00 | 6.73E-03 | NaN | | ASXL3,TGFB2 |
| FAT10 Cancer Signaling Pathway | 1.17E+00 | 2.00E-02 | NaN | | TGFB2 |
| UVC-Induced MAPK Signaling | 1.16E+00 | 1.96E-02 | NaN | | MAPK10 |
| UVB-Induced MAPK Signaling | 1.15E+00 | 1.92E-02 | NaN | | MAPK10 |
| Neuroinflammation Signaling Pathway | 1.15E+00 | 6.35E-03 | NaN | | MAPK10,TGFB2 |
| Phototransduction Pathway | 1.14E+00 | 1.85E-02 | NaN | | GUCY1B1 |
| CD27 Signaling in Lymphocytes | 1.11E+00 | 1.75E-02 | NaN | | MAPK10 |
| Role of IL-17A in Arthritis | 1.11E+00 | 1.75E-02 | NaN | | MAPK10 |
| PCP (Planar Cell Polarity) Pathway | 1.09E+00 | 1.67E-02 | NaN | | MAPK10 |
| Activation of IRF by Cytosolic Pattern Recognition Receptors | 1.06E+00 | 1.54E-02 | NaN | | MAPK10 |
| Induction of Apoptosis by HIV1 | 1.06E+00 | 1.54E-02 | NaN | | MAPK10 |
| Role of PI3K/AKT Signaling in the Pathogenesis of Influenza | 1.05E+00 | 1.52E-02 | NaN | | CCR5 |
| CD40 Signaling | 1.05E+00 | 1.49E-02 | NaN | | MAPK10 |
| IL-17A Signaling in Airway Cells | 1.05E+00 | 1.49E-02 | NaN | | MAPK10 |
| Cell Cycle: G1/S Checkpoint Regulation | 1.04E+00 | 1.47E-02 | NaN | | TGFB2 |
| Agrin Interactions at Neuromuscular Junction | 1.03E+00 | 1.43E-02 | NaN | | MAPK10 |
| IL-10 Signaling | 1.02E+00 | 1.39E-02 | NaN | | CCR5 |
| Netrin Signaling | 1.02E+00 | 1.39E-02 | NaN | | PRKG1 |
| Caveolar-mediated Endocytosis Signaling | 1.00E+00 | 1.33E-02 | NaN | | ARCN1 |
| GDNF Family Ligand-Receptor Interactions | 9.96E-01 | 1.32E-02 | NaN | | MAPK10 |
| Role of MAPK Signaling in Inhibiting the Pathogenesis of Influenza | 9.96E-01 | 1.32E-02 | NaN | | MAPK10 |
| Antiproliferative Role of Somatostatin Receptor 2 | 9.91E-01 | 1.30E-02 | NaN | | GUCY1B1 |
| VDR/RXR Activation | 9.83E-01 | 1.28E-02 | NaN | | TGFB2 |
| NF-κB Activation by Viruses | 9.83E-01 | 1.28E-02 | NaN | | CCR5 |
| Chemokine Signaling | 9.75E-01 | 1.25E-02 | NaN | | CCR5 |
| Role of MAPK Signaling in the Pathogenesis of Influenza | 9.71E-01 | 1.23E-02 | NaN | | MAPK10 |
| BEX2 Signaling Pathway | 9.71E-01 | 1.23E-02 | NaN | | MAPK10 |
| TR/RXR Activation | 9.55E-01 | 1.19E-02 | NaN | | COL6A3 |
| Cyclins and Cell Cycle Regulation | 9.55E-01 | 1.19E-02 | NaN | | TGFB2 |
| FcγRIIB Signaling in B Lymphocytes | 9.51E-01 | 1.18E-02 | NaN | | MAPK10 |
| LPS-stimulated MAPK Signaling | 9.51E-01 | 1.18E-02 | NaN | | MAPK10 |
| Apelin Adipocyte Signaling Pathway | 9.43E-01 | 1.16E-02 | NaN | | MAPK10 |
| BMP signaling pathway | 9.39E-01 | 1.15E-02 | NaN | | MAPK10 |
| Hepatic Fibrosis Signaling Pathway | 9.36E-01 | 4.77E-03 | NaN | | MAPK10,TGFB2 |
| RANK Signaling in Osteoclasts | 9.21E-01 | 1.10E-02 | NaN | | MAPK10 |
| IL-1 Signaling | 9.10E-01 | 1.06E-02 | NaN | | MAPK10 |
| ERBB Signaling | 9.10E-01 | 1.06E-02 | NaN | | MAPK10 |
| TGF-β Signaling | 9.00E-01 | 1.04E-02 | NaN | | TGFB2 |
| ATM Signaling | 8.96E-01 | 1.03E-02 | NaN | | MAPK10 |
| Molecular Mechanisms of Cancer | 8.93E-01 | 4.49E-03 | NaN | | MAPK10,TGFB2 |
| UVA-Induced MAPK Signaling | 8.93E-01 | 1.02E-02 | NaN | | MAPK10 |
| Apelin Cardiomyocyte Signaling Pathway | 8.86E-01 | 1.01E-02 | NaN | | MAPK10 |
| Neuropathic Pain Signaling In Dorsal Horn Neurons | 8.79E-01 | 9.90E-03 | NaN | | KCNQ3 |
| Sumoylation Pathway | 8.70E-01 | 9.71E-03 | NaN | | MAPK10 |
| Regulation of IL-2 Expression in Activated and Anergic T Lymphocytes | 8.66E-01 | 4.34E-03 | NaN | | MAPK10,TGFB2 |
| PD-1, PD-L1 cancer immunotherapy pathway | 8.60E-01 | 9.43E-03 | NaN | | TGFB2 |
| Chronic Myeloid Leukemia Signaling | 8.57E-01 | 9.35E-03 | NaN | | TGFB2 |
| Paxillin Signaling | 8.51E-01 | 9.26E-03 | NaN | | MAPK10 |
| Antioxidant Action of Vitamin C | 8.42E-01 | 9.01E-03 | NaN | | MAPK10 |
| Role of MAPK Signaling in Promoting the Pathogenesis of Influenza | 8.39E-01 | 8.93E-03 | NaN | | MAPK10 |
| Fc Epsilon RI Signaling | 8.15E-01 | 8.47E-03 | NaN | | MAPK10 |
| Airway Pathology in Chronic Obstructive Pulmonary Disease | 8.15E-01 | 8.47E-03 | NaN | | TGFB2 |
| PAK Signaling | 8.15E-01 | 8.47E-03 | NaN | | MAPK10 |
| NGF Signaling | 8.15E-01 | 8.47E-03 | NaN | | MAPK10 |
| p38 MAPK Signaling | 8.15E-01 | 8.47E-03 | NaN | | TGFB2 |
| CCR5 Signaling in Macrophages | 8.12E-01 | 4.01E-03 | NaN | | CCR5,MAPK10 |
| Cholecystokinin/Gastrin-mediated Signaling | 8.12E-01 | 8.40E-03 | NaN | | MAPK10 |
| Renin-Angiotensin Signaling | 8.10E-01 | 8.33E-03 | NaN | | MAPK10 |
| Th1 Pathway | 8.04E-01 | 8.20E-03 | NaN | | CCR5 |
| Endocannabinoid Developing Neuron Pathway | 7.99E-01 | 8.13E-03 | NaN | | MAPK10 |
| FXR/RXR Activation | 7.90E-01 | 7.94E-03 | NaN | | MAPK10 |
| Reelin Signaling in Neurons | 7.90E-01 | 7.94E-03 | NaN | | MAPK10 |
| Ferroptosis Signaling Pathway | 7.90E-01 | 7.94E-03 | NaN | | EMP1 |
| 14-3-3-mediated Signaling | 7.88E-01 | 7.87E-03 | NaN | | MAPK10 |
| GP6 Signaling Pathway | 7.88E-01 | 7.87E-03 | NaN | | COL6A3 |
| IL-6 Signaling | 7.85E-01 | 7.81E-03 | NaN | | MAPK10 |
| GABA Receptor Signaling | 7.75E-01 | 7.63E-03 | NaN | | KCNQ3 |
| HGF Signaling | 7.72E-01 | 7.58E-03 | NaN | | MAPK10 |
| Role of PKR in Interferon Induction and Antiviral Response | 7.59E-01 | 7.35E-03 | NaN | | MAPK10 |
| Th2 Pathway | 7.57E-01 | 7.30E-03 | NaN | | CCR5 |
| Apelin Endothelial Signaling Pathway | 7.52E-01 | 7.19E-03 | NaN | | MAPK10 |
| Endocannabinoid Neuronal Synapse Pathway | 7.30E-01 | 6.80E-03 | NaN | | MAPK10 |
| Corticotropin Releasing Hormone Signaling | 7.24E-01 | 6.71E-03 | NaN | | GUCY1B1 |
| NAD Signaling Pathway | 7.19E-01 | 6.62E-03 | NaN | | TGFB2 |
| Type II Diabetes Mellitus Signaling | 7.17E-01 | 6.58E-03 | NaN | | MAPK10 |
| Relaxin Signaling | 7.14E-01 | 6.54E-03 | NaN | | GUCY1B1 |
| Glucocorticoid Receptor Signaling | 7.10E-01 | 3.44E-03 | NaN | | MAPK10,TGFB2 |
| Epithelial Adherens Junction Signaling | 7.03E-01 | 6.37E-03 | NaN | | TGFB2 |
| Breast Cancer Regulation by Stathmin1 | 6.99E-01 | 3.38E-03 | NaN | | CCR5,TGFB2 |
| CREB Signaling in Neurons | 6.86E-01 | 3.32E-03 | NaN | | CCR5,TGFB2 |
| Human Embryonic Stem Cell Pluripotency | 6.82E-01 | 6.02E-03 | NaN | | TGFB2 |
| CXCR4 Signaling | 6.80E-01 | 5.99E-03 | NaN | | MAPK10 |
| Mitochondrial Dysfunction | 6.70E-01 | 5.85E-03 | NaN | | MAPK10 |
| Th1 and Th2 Activation Pathway | 6.68E-01 | 5.81E-03 | NaN | | CCR5 |
| WNT/β-catenin Signaling | 6.66E-01 | 5.78E-03 | NaN | | TGFB2 |
| D-myo-inositol (1,4,5,6)-Tetrakisphosphate Biosynthesis | 6.60E-01 | 5.68E-03 | NaN | | ALPL |
| D-myo-inositol (3,4,5,6)-tetrakisphosphate Biosynthesis | 6.60E-01 | 5.68E-03 | NaN | | ALPL |
| Erythropoietin Signaling Pathway | 6.58E-01 | 5.65E-03 | NaN | | TGFB2 |
| Tight Junction Signaling | 6.56E-01 | 5.62E-03 | NaN | | TGFB2 |
| Tumor Microenvironment Pathway | 6.54E-01 | 5.59E-03 | NaN | | TGFB2 |
| GNRH Signaling | 6.35E-01 | 5.32E-03 | NaN | | MAPK10 |
| 3-phosphoinositide Degradation | 6.35E-01 | 5.32E-03 | NaN | | ALPL |
| Granulocyte Adhesion and Diapedesis | 6.33E-01 | 5.29E-03 | NaN | | CCR5 |
| Production of Nitric Oxide and Reactive Oxygen Species in Macrophages | 6.29E-01 | 5.24E-03 | NaN | | MAPK10 |
| D-myo-inositol-5-phosphate Metabolism | 6.27E-01 | 5.21E-03 | NaN | | ALPL |
| Leukocyte Extravasation Signaling | 6.23E-01 | 5.18E-03 | NaN | | MAPK10 |
| PPARα/RXRα Activation | 6.23E-01 | 5.18E-03 | NaN | | TGFB2 |
| Regulation of the Epithelial-Mesenchymal Transition Pathway | 6.20E-01 | 5.13E-03 | NaN | | TGFB2 |
| ILK Signaling | 6.14E-01 | 5.05E-03 | NaN | | MAPK10 |
| Gustation Pathway | 6.11E-01 | 5.00E-03 | NaN | | KCNQ3 |
| 3-phosphoinositide Biosynthesis | 6.07E-01 | 4.95E-03 | NaN | | ALPL |
| Coronavirus Pathogenesis Pathway | 6.06E-01 | 4.93E-03 | NaN | | MAPK10 |
| HIF1α Signaling | 5.95E-01 | 4.81E-03 | NaN | | TGFB2 |
| IL-8 Signaling | 5.90E-01 | 4.74E-03 | NaN | | MAPK10 |
| Agranulocyte Adhesion and Diapedesis | 5.85E-01 | 4.67E-03 | NaN | | CCR5 |
| RHOGDI Signaling | 5.83E-01 | 4.65E-03 | NaN | | CDH6 |
| Superpathway of Inositol Phosphate Compounds | 5.56E-01 | 4.31E-03 | NaN | | ALPL |
| Osteoarthritis Pathway | 5.53E-01 | 4.27E-03 | NaN | | ALPL |
| Opioid Signaling Pathway | 4.92E-01 | 3.62E-03 | NaN | | FOSB |
| Synaptogenesis Signaling Pathway | 4.49E-01 | 3.21E-03 | NaN | | CDH6 |
| Protein Kinase A Signaling | 3.64E-01 | 2.49E-03 | NaN | | TGFB2 |
| Antiproliferative Role of TOB in T Cell Signaling | 3.45E-01 | 2.35E-03 | NaN | | TGFB2 |
| OX40 Signaling Pathway | 3.08E-01 | 2.09E-03 | NaN | | MAPK10 |
| SAPK/JNK Signaling | 2.94E-01 | 1.99E-03 | NaN | | MAPK10 |
| Type I Diabetes Mellitus Signaling | 2.90E-01 | 1.96E-03 | NaN | | MAPK10 |
| CD28 Signaling in T Helper Cells | 2.85E-01 | 1.93E-03 | NaN | | MAPK10 |
| T Cell Exhaustion Signaling Pathway | 2.59E-01 | 1.77E-03 | NaN | | MAPK10 |
| CDC42 Signaling | 2.54E-01 | 1.74E-03 | NaN | | MAPK10 |
| TEC Kinase Signaling | 2.52E-01 | 1.73E-03 | NaN | | MAPK10 |
| Dendritic Cell Maturation | 2.47E-01 | 1.70E-03 | NaN | | MAPK10 |
| Phagosome Formation | 2.05E-01 | 1.45E-03 | NaN | | CCR5 |
| Systemic Lupus Erythematosus In B Cell Signaling Pathway | 0.00E+00 | 1.38E-03 | NaN | | TGFB2 |
|  |  | | |  | |
| **Category (Disease&Function)** | **p-value** | | | | **Molecules** |
| Cell-To-Cell Signaling and Interaction | 1.9E-06-1.94E-02 | | | | CCR5,COL6A3,DCAF1,GUCY1B1,KCNQ3,LTBP1,MAPK10,PRKG1,SH3TC2,TGFB2,TREML1,TRPA1 |
| Nervous System Development and Function | 1.9E-06-1.98E-02 | | | | ALPL,CCR5,CDH6,FOSB,KCNQ3,MAPK10,MEIS2,NFIB,PRKG1,SH3TC2,TENM4,TGFB2,TRPA1 |
| Cardiovascular Disease | 8.46E-05-1.53E-02 | | | | ANKRD29,CCR5,FOSB,GUCY1B1,LTBP1,MEIS2,MYO3B,PRKG1,TGFB2 |
| Organismal Injury and Abnormalities | 8.46E-05-2.01E-02 | | | | ALPL,ANKRD29,ARCN1,ASXL3,CCR5,CDH6,CFAP43,COL6A3,DCAF1,EMP1,FOSB,GUCY1B1,KCNJ15,KCNQ3,LTBP1,MAPK10,MEIS2,MYO3B,NFIB,NKAIN2,PRKG1,RABL2B,RASL11B,RHBDL3,SH3BGRL2,SH3TC2,SLC28A3,SLC47A2,SMIM24,TENM4,TGFB2,TREML1,TRPA1 |
| Cardiovascular System Development and Function | 1.03E-04-1.94E-02 | | | | CCR5,EMP1,LTBP1,PRKG1,TGFB2 |
| Embryonic Development | 1.03E-04-1.94E-02 | | | | ALPL,CCR5,CDH6,CFAP43,COL6A3,EMP1,FOSB,LTBP1,MEIS2,MYO3B,NFIB,PRKG1,TENM4,TGFB2,TRPA1 |
| Organismal Development | 1.03E-04-1.94E-02 | | | | ALPL,CCR5,CDH6,CFAP43,EMP1,FOSB,GUCY1B1,LTBP1,MEIS2,MYO3B,NFIB,PRKG1,TENM4,TGFB2 |
| Tissue Development | 1.03E-04-1.94E-02 | | | | ALPL,CCR5,COL6A3,EMP1,FOSB,LTBP1,MEIS2,NFIB,PRKG1,TENM4,TGFB2 |
| Cell Death and Survival | 1.24E-04-1.25E-02 | | | | ARCN1,CCR5,CDH6,DCAF1,EMP1,FOSB,LTBP1,MAPK10,MEIS2,NFIB,PRKG1,SLC28A3,TGFB2 |
| Digestive System Development and Function | 1.24E-04-1.94E-02 | | | | ALPL,CCR5,GUCY1B1,MEIS2,NFIB,PRKG1,TGFB2 |
| Gastrointestinal Disease | 1.24E-04-1.99E-02 | | | | ALPL,ANKRD29,ARCN1,ASXL3,CCR5,CDH6,CFAP43,COL6A3,DCAF1,EMP1,FOSB,GUCY1B1,KCNJ15,KCNQ3,LTBP1,MAPK10,MEIS2,MYO3B,NFIB,NKAIN2,PRKG1,RASL11B,RHBDL3,SH3BGRL2,SH3TC2,SLC28A3,SLC47A2,TENM4,TGFB2,TREML1,TRPA1 |
| Developmental Disorder | 1.28E-04-1.8E-02 | | | | ALPL,ARCN1,ASXL3,CDH6,COL6A3,KCNQ3,LTBP1,MEIS2,NFIB,PRKG1,SH3TC2,TGFB2,TREML1 |
| Neurological Disease | 1.28E-04-1.8E-02 | | | | ALPL,ARCN1,ASXL3,CCR5,CDH6,CFAP43,COL6A3,DCAF1,FOSB,GUCY1B1,KCNJ15,KCNQ3,LTBP1,MAPK10,MEIS2,MYO3B,NFIB,NKAIN2,PRKG1,SH3TC2,SLC28A3,SLC47A2,SMIM24,TENM4,TGFB2,TRPA1 |
| Cancer | 1.75E-04-2.01E-02 | | | | ALPL,ANKRD29,ARCN1,ASXL3,CCR5,CDH6,CFAP43,COL6A3,DCAF1,EMP1,FOSB,GUCY1B1,KCNJ15,KCNQ3,LTBP1,MAPK10,MEIS2,MYO3B,NFIB,NKAIN2,PRKG1,RABL2B,RASL11B,RHBDL3,SH3BGRL2,SH3TC2,SLC28A3,SLC47A2,SMIM24,TENM4,TGFB2,TREML1,TRPA1 |
| Endocrine System Disorders | 1.86E-04-1.96E-02 | | | | ALPL,ANKRD29,ASXL3,CCR5,CDH6,CFAP43,COL6A3,DCAF1,FOSB,GUCY1B1,KCNJ15,KCNQ3,LTBP1,MEIS2,MYO3B,NFIB,PRKG1,SH3TC2,SLC28A3,SLC47A2,TENM4,TGFB2,TREML1,TRPA1 |
| Tissue Morphology | 1.97E-04-1.53E-02 | | | | ALPL,CCR5,COL6A3,LTBP1,MAPK10,PRKG1,TENM4,TGFB2,TRPA1 |
| Hereditary Disorder | 4.24E-04-1.8E-02 | | | | ALPL,ARCN1,ASXL3,CFAP43,COL6A3,KCNQ3,LTBP1,MEIS2,NFIB,PRKG1,SH3TC2,TENM4,TGFB2,TREML1,TRPA1 |
| Reproductive System Disease | 4.24E-04-1.96E-02 | | | | ALPL,ARCN1,ASXL3,CCR5,CDH6,CFAP43,COL6A3,DCAF1,FOSB,GUCY1B1,KCNJ15,KCNQ3,LTBP1,MAPK10,MEIS2,MYO3B,PRKG1,RABL2B,RHBDL3,SH3TC2,SLC28A3,SLC47A2,TENM4,TGFB2,TREML1,TRPA1 |
| Molecular Transport | 5.9E-04-2.02E-02 | | | | ARCN1,CCR5,FOSB,GUCY1B1,KCNJ15,KCNQ3,LTBP1,MAPK10,PRKG1,SLC28A3,SLC47A2,TGFB2,TRPA1 |
| Organ Morphology | 6.47E-04-1.94E-02 | | | | ALPL,CCR5,GUCY1B1,MEIS2,NFIB,PRKG1,TGFB2 |
| Energy Production | 7.52E-04-7.52E-04 | | | | GUCY1B1,PRKG1 |
| Nucleic Acid Metabolism | 7.52E-04-9.75E-03 | | | | ALPL,GUCY1B1,PRKG1,SLC28A3 |
| Small Molecule Biochemistry | 7.52E-04-1.94E-02 | | | | ALPL,GUCY1B1,MAPK10,PRKG1,SLC28A3,TGFB2,TRPA1 |
| Cell Signaling | 1.03E-03-2.02E-02 | | | | CCR5,GUCY1B1,LTBP1,MAPK10,PRKG1,TRPA1 |
| Behavior | 1.1E-03-1.98E-02 | | | | ARCN1,CCR5,FOSB,MAPK10,MEIS2,PRKG1,TRPA1 |
| Cellular Movement | 1.1E-03-1.67E-02 | | | | ALPL,CCR5,MAPK10,PRKG1,TGFB2 |
| Respiratory Disease | 1.1E-03-1.39E-02 | | | | ALPL,CCR5,LTBP1,MEIS2,TGFB2,TREML1 |
| Infectious Diseases | 1.16E-03-2.01E-02 | | | | ALPL,ARCN1,CCR5,DCAF1,EMP1,KCNQ3,NFIB,TGFB2 |
| Inflammatory Disease | 1.16E-03-1.56E-02 | | | | ALPL,ARCN1,CCR5,FOSB,KCNJ15,NKAIN2,TENM4,TGFB2 |
| Inflammatory Response | 1.16E-03-1.94E-02 | | | | ALPL,ARCN1,CCR5,FOSB,GUCY1B1,KCNJ15,MAPK10,PRKG1,TGFB2,TREML1 |
| Skeletal and Muscular Disorders | 1.16E-03-1.94E-02 | | | | ALPL,ARCN1,CCR5,COL6A3,FOSB,KCNJ15,LTBP1,MEIS2,NFIB,PRKG1,SH3TC2,TGFB2 |
| Skeletal and Muscular System Development and Function | 1.16E-03-1.94E-02 | | | | ALPL,CCR5,COL6A3,LTBP1,PRKG1,TGFB2 |
| Auditory Disease | 1.4E-03-5.58E-03 | | | | TGFB2 |
| Auditory and Vestibular System Development and Function | 1.4E-03-5.58E-03 | | | | PRKG1,TGFB2 |
| Cell Morphology | 1.4E-03-1.94E-02 | | | | CCR5,CDH6,LTBP1,MAPK10,MYO3B,NFIB,PRKG1,TENM4,TGFB2 |
| Cellular Assembly and Organization | 1.4E-03-1.94E-02 | | | | CCR5,COL6A3,MAPK10,MYO3B,NFIB,PRKG1,RABL2B,TENM4,TGFB2 |
| Cellular Development | 1.4E-03-1.94E-02 | | | | CCR5,DCAF1,FOSB,LTBP1,NFIB,PRKG1,TENM4,TGFB2 |
| Cellular Function and Maintenance | 1.4E-03-2.02E-02 | | | | CCR5,LTBP1,MAPK10,MYO3B,NFIB,PRKG1,RABL2B,TENM4,TGFB2,TRPA1 |
| Cellular Growth and Proliferation | 1.4E-03-1.94E-02 | | | | CCR5,COL6A3,DCAF1,LTBP1,NFIB,PRKG1,TENM4,TGFB2,TRPA1 |
| Connective Tissue Development and Function | 1.4E-03-1.94E-02 | | | | ALPL,CCR5,FOSB,PRKG1,TGFB2 |
| Connective Tissue Disorders | 1.4E-03-1.94E-02 | | | | ALPL,ARCN1,CCR5,COL6A3,FOSB,KCNJ15,MEIS2,NFIB,TGFB2 |
| Hematological System Development and Function | 1.4E-03-1.94E-02 | | | | ALPL,CCR5,FOSB,GUCY1B1,LTBP1,MAPK10,PRKG1,TREML1 |
| Hepatic System Development and Function | 1.4E-03-1.94E-02 | | | | ALPL,CCR5,GUCY1B1,MEIS2 |
| Hepatic System Disease | 1.4E-03-1.99E-02 | | | | ALPL,ASXL3,CCR5,CDH6,COL6A3,DCAF1,GUCY1B1,KCNJ15,KCNQ3,LTBP1,MAPK10,MEIS2,MYO3B,NFIB,PRKG1,SH3TC2,SLC28A3,TENM4,TGFB2,TRPA1 |
| Immunological Disease | 1.4E-03-1.94E-02 | | | | ALPL,ARCN1,CCR5,COL6A3,FOSB,KCNJ15,LTBP1,TGFB2 |
| Lymphoid Tissue Structure and Development | 1.4E-03-1.8E-02 | | | | ALPL,CCR5,FOSB,LTBP1,TGFB2 |
| Metabolic Disease | 1.4E-03-1.86E-02 | | | | ALPL,CCR5,COL6A3,GUCY1B1,LTBP1,MAPK10,MEIS2,MYO3B |
| Ophthalmic Disease | 1.4E-03-1.39E-02 | | | | MEIS2,TGFB2 |
| Organ Development | 1.4E-03-1.94E-02 | | | | ALPL,CCR5,EMP1,FOSB,LTBP1,MEIS2,NFIB,TGFB2 |
| Tumor Morphology | 1.4E-03-1.39E-02 | | | | DCAF1,TGFB2 |
| Dermatological Diseases and Conditions | 2.21E-03-1.8E-02 | | | | ALPL,ANKRD29,ARCN1,ASXL3,CCR5,CDH6,CFAP43,COL6A3,DCAF1,FOSB,KCNJ15,KCNQ3,LTBP1,MAPK10,MYO3B,NFIB,NKAIN2,PRKG1,SH3BGRL2,SH3TC2,SLC28A3,SLC47A2,SMIM24,TENM4,TGFB2,TRPA1 |
| Cell Cycle | 2.49E-03-1.8E-02 | | | | CCR5,COL6A3,DCAF1,LTBP1,MEIS2,PRKG1,TGFB2 |
| Cellular Compromise | 2.8E-03-1.39E-02 | | | | MAPK10,PRKG1 |
| Dental Disease | 2.8E-03-1.11E-02 | | | | ALPL,TGFB2 |
| Hair and Skin Development and Function | 2.8E-03-1.53E-02 | | | | CCR5,NFIB,TGFB2,TRPA1 |
| Hematological Disease | 2.8E-03-1.98E-02 | | | | ALPL,ASXL3,CCR5,COL6A3,KCNJ15,LTBP1,MEIS2,MYO3B,NFIB,PRKG1,RABL2B,SLC28A3,TENM4,TGFB2 |
| Protein Synthesis | 2.8E-03-2.8E-03 | | | | CCR5 |
| Reproductive System Development and Function | 2.8E-03-1.67E-02 | | | | CCR5,FOSB,PRKG1,TGFB2 |
| Visual System Development and Function | 2.8E-03-1.39E-02 | | | | MEIS2,TGFB2 |
| DNA Replication, Recombination, and Repair | 4.19E-03-6.97E-03 | | | | ALPL,CCR5 |
| Immune Cell Trafficking | 4.19E-03-1.53E-02 | | | | CCR5,MAPK10 |
| Cell-mediated Immune Response | 5.58E-03-1.53E-02 | | | | CCR5,LTBP1,MAPK10 |
| Hematopoiesis | 5.58E-03-5.58E-03 | | | | LTBP1 |
| Post-Translational Modification | 5.58E-03-5.58E-03 | | | | MAPK10 |
| Renal and Urological System Development and Function | 6.97E-03-1.94E-02 | | | | CCR5,TRPA1 |
| Vitamin and Mineral Metabolism | 7.26E-03-2.02E-02 | | | | CCR5,LTBP1,PRKG1,TRPA1 |
| Respiratory System Development and Function | 7.49E-03-1.94E-02 | | | | DCAF1,NFIB,TGFB2 |
| Drug Metabolism | 8.36E-03-1.94E-02 | | | | MAPK10,PRKG1,SLC47A2,TGFB2 |
| Nutritional Disease | 8.36E-03-8.36E-03 | | | | ALPL |
